# Supplementary material for: Statistical inference of keystone taxa reshaping the assembly rules of forest root microbiomes
Source: Research Square preprint supplement (doi:10.21203/rs.3.rs-7962497/v1), 2025-11-10
Supplement: Supplementary file 1 [file 5fedb08d87ee6d6474082fbb.pdf]

Supplementary Information for

Statistical inference of keystone taxa reshaping the assembly  
rules of forest root microbiomes

Mikihito Noguchi<sup>1-3</sup>, Kenta Suzuki<sup>4,5</sup>, Hiroaki Fujita<sup>2,6</sup>, and Hirokazu Toju<sup>2,6</sup>

<sup>1</sup>Center for Ecological Research, Kyoto University, Otsu, Shiga 520-2133, Japan

<sup>2</sup>Laboratory of Ecosystems and Coevolution, Graduate School of Biostudies, Kyoto University, Kyoto 606-8501, Japan

<sup>3</sup>Research Fellow of Japan Society for the Promotion of Science, Tokyo, Japan

<sup>4</sup>Integrated Bioresource Information Division, BioResource Research Center, RIKEN, Tsukuba, Ibaraki 305-0074, Japan.

<sup>5</sup>Institute for Multidisciplinary Sciences, Yokohama National University, Yokohama, Kanagawa 240-8501, Japan.

<sup>6</sup>Center for Living Systems Information Science (CeLiSIS), Graduate School of Biostudies, Kyoto University, Kyoto 606-8501, Japan

Correspondence:

Mikihito Noguchi: [noguchi.mikihito.57s@st.kyoto-u.ac.jp](mailto:noguchi.mikihito.57s@st.kyoto-u.ac.jp)

Hirokazu Toju: [toju.hirokazu.4c@kyoto-u.ac.jp](mailto:toju.hirokazu.4c@kyoto-u.ac.jp)

## 22 **Supplementary Methods**

### 23 **Root microbiome data**

24 We compiled the root-tip fungal community datasets described in our previous study with newly  
25 obtained prokaryotic data<sup>1</sup>. Briefly, root-tip samples (1 cm terminal roots) were sampled in the  
26 research forest of Sugadaira Research Station, Mountain Science Center, University of Tsukuba, Ueda,  
27 Nagano Prefecture, Japan (36.524 °N; 138.349 °E; 1,340 m a.s.l.). The root tips were sonicated in  
28 0.5% tween 20 and surface sterilized subsequently with NaClO (Nakalaitesque, effective chlorine  
29 concentration ca. 11%) diluted to 1% (v/v), sterile distilled water (three times), and 99.5% ethanol<sup>1</sup>.  
30 After DNA extraction with a cetyltrimethylammonium bromide (CTAB) method, the internal  
31 transcribed spacer (ITS) region of fungi and the 16S rRNA region of prokaryotes were PCR-amplified  
32 and the purified amplicons were sequenced in an Illumina MiSeq sequencer<sup>1</sup>. The obtained  
33 134,066,687 and 73,183,237 sequencing reads of ITS and 16S rRNA region were converted into  
34 FASTQ files using bcl2fastq (version 1.8.4) and demultiplexed with Claident v0.9.2022.01.26<sup>2,3</sup>. From  
35 these outputs, amplicon sequence variants (ASVs) were constructed by adaptor trimming by Cutadapt<sup>4</sup>  
36 (version. 3.7), quality filtering and denoising by DADA2<sup>5</sup> v.1.18.0 of R 4.2.2<sup>6</sup>. Contaminant ASVs  
37 were removed with the R package “decontam” (the method “prevalence”) <sup>7</sup>. Taking into account  
38 duplication error in PCR, the ASVs were re-clustered into operational taxonomic units (OTUs) with a  
39 97% similarity threshold using the program VSEARCH v2.21.1<sup>8</sup>. The taxonomic assignments of  
40 fungal and prokaryotic OTUs were performed based on the UNITE<sup>9</sup> general FASTA release for  
41 eukaryotes 2. Version 18.07.2023 and the SILVA<sup>10</sup> version 138 database using the naive Bayesian  
42 classifier method in DADA2<sup>5,11</sup>. The root sample which had less than 1,000 fungal/prokaryotic reads  
43 were discarded. Then, obtained fungal/prokaryotic OTU matrices of the samples whose host plants  
44 (described elsewhere<sup>1</sup>) were detected more than 50 times (*Acer*, *Betula*, *Juglans*, *Larix*, *Pinus* and  
45 *Populus*) were rarefied with coverage-based method using “vegan” package v.2.6-8<sup>12</sup>. In total, both  
46 fungal and prokaryotic community data were obtained for 1,270 root samples collected from the 125  
47 sampling points. In total, 2,249 fungal and 12,479 prokaryotic OTUs were obtained from those root  
48 samples.

### 50 **Host preference of the fungal/prokaryotic families**

51 To evaluate the host specificity of the fungal and prokaryotic families used in energy landscape  
52 estimation, we calculated the  $d'$  metrics of interaction specificity<sup>13</sup> and two dimensional preference of  
53 plant fungal associations ( $2DP$ )<sup>14</sup> for the 34 fungal and 45 prokaryotic families (selected in  
54 Supplementary Figs. S1, S3) with the same way as our previous study<sup>1</sup>. In this analyses, the  
55 fungal/prokaryotic community data were binarized with the same criteria as energy landscape analysis  
56 (described detail below). The standardized indices and their statistical significances were assessed by  
57 comparing the observed data with null model simulations. Specifically, the host plant information was  
58 shuffled among root samples collected at the same sampling positions (10,000 permutations), and the

indices calculated from the randomized datasets were compared to the original one. For each fungal and prokaryotic family, a standardized  $d'$  metrics was calculated as follows:

$$[d'_{\text{original}} - \text{Mean}(d'_{\text{randomized}})] / \text{SD}(d'_{\text{randomized}}),$$

where  $d'_{\text{original}}$  was the  $d'$  estimate of the original data and  $\text{Mean}(d'_{\text{randomized}})$  and  $\text{SD}(d'_{\text{randomized}})$  were the mean and standard deviation of the  $d'$  of randomized data matrices. For each pair of six host plants and fungal/prokaryotic family, standardized  $2DP$  was also calculated as follows:

$$[N_{\text{original}}(i, j) - \text{Mean}(N_{\text{randomized}}(i, j))] / \text{SD}(N_{\text{randomized}}(i, j)),$$

where  $N_{\text{original}}(i, j)$  denoted the number of root samples from which a focal combination of a symbiont family and a host plant was observed in the original data, and the  $\text{Mean}(N_{\text{randomized}}(i, j))$  and  $\text{SD}(N_{\text{randomized}}(i, j))$  were the mean and standard deviation of the number of samples for the focal symbiont-plant pair across randomized matrices. False discovery rates [FDR<sup>15</sup>] were also calculated to evaluate the statistical significance of the two indices ( $d'$  metrics ; one-tailed tests,  $2DP$ ; two-tailed tests).

### Preparation of data matrices for energy landscape analysis

After excluding five and three samples in which more than 50% of sequence reads could not be annotated at the family level in fungal and prokaryotic communities respectively, the fungal and prokaryotic data matrices were converted into a binary format. The threshold of the binarization was set as  $\text{Mean}(\log(X_i)) - 2 \text{SD}(\log(X_i))$ , where  $X_i$  denotes the read counts of taxon  $i$  across the samples in which it was detected. To make exploration within assembly graphs ( $2^S$  possible community states, where  $S$  is the number of taxa) computationally feasible, we prioritized and selected families, respectively, in the fungal and prokaryotic data. Specifically, a series of permutational analyses of variance (PerMANOVA)<sup>16</sup> was performed for the relative abundance matrix of fungal or prokaryotic data by setting the presence/absence of a target family as an explanatory variable (10,000 iterations). In the PerMANOVA, the Bray-Curtis metric was used to calculate community dissimilarity between root samples, and the host plants and sampling points were set as additional explanatory variables (i.e., covariates). Families were then ordered depending on their explanatory power ( $R^2$ ) in the PerMANOVA. The optimal set (number) of families to be analyzed in the energy landscape analysis was subsequently explored for the fungal and prokaryotic data, respectively. To apply a simple criterion, we evaluated correspondence between the community dissimilarity values calculated based on the original relative abundance data (Bray-Curtis distance for quantitative data) and those calculated based on the binarized data (Jaccard distance for binary data). An optimal binarized data matrix (sets of families) preserving the information of original relative abundance data was selected based on the Kendall's rank correlation coefficient for the correspondence between quantitative and binary data.

## 94    **Supplementary references**

- 95    1.    Noguchi, M. & Toju, H. Mycorrhizal and endophytic fungi structure forest below-ground  
96       symbiosis through contrasting but interdependent assembly processes. *Environ. Microbiome* **19**,  
97       84 (2024).
- 98    2.    Tanabe, A. S. & Toju, H. Two New Computational Methods for Universal DNA Barcoding: A  
99       Benchmark Using Barcode Sequences of Bacteria, Archaea, Animals, Fungi, and Land Plants.  
100      *PLoS ONE* **8**, e76910 (2013).
- 101   3.    Tanabe, A. S. Claident v0.9.2022.01.26. 2022. (2022).
- 102   4.    Martin, M. Cutadapt removes adapter sequences from high-throughput sequencing reads.  
103      *EMBnet.journal* **17**, 10–12 (2011).
- 104   5.    Callahan, B. J. *et al.* DADA2: High-resolution sample inference from Illumina amplicon data.  
105      *Nat. Methods* **13**, 581–583 (2016).
- 106   6.    R Core Team. R: A language and environment for statistical computing. (2022).
- 107   7.    Davis, N. M., Proctor, D. M., Holmes, S. P., Relman, D. A. & Callahan, B. J. Simple statistical  
108       identification and removal of contaminant sequences in marker-gene and metagenomics data.  
109      *Microbiome* **6**, 226 (2018).
- 110   8.    Rognes, T., Flouri, T., Nichols, B., Quince, C. & Mahé, F. VSEARCH: a versatile open source tool  
111       for metagenomics. *PeerJ* **4**, e2584 (2016).
- 112   9.    Abarenkov, K. *et al.* UNITE general FASTA release for eukaryotes 2. UNITE Community.  
113      <https://doi.org/10.15156/BIO/2938070> (2023).
- 114   10. Quast, C. *et al.* The SILVA ribosomal RNA gene database project: improved data processing and  
115       web-based tools. *Nucleic Acids Res.* **41**, D590–D596 (2013).
- 116   11. Wang, Q., Garrity, G. M., Tiedje, J. M. & Cole, J. R. Naïve Bayesian Classifier for Rapid  
117       Assignment of rRNA Sequences into the New Bacterial Taxonomy. *Appl. Environ. Microbiol.* **73**,  
118       5261–5267 (2007).
- 119   12. Oksanen, O. *et al.* vegan: Community Ecology Package. (2022).
- 120   13. Blüthgen, N., Menzel, F., Hovestadt, T., Fiala, B. & Blüthgen, N. Specialization, Constraints, and

- 121       Conflicting Interests in Mutualistic Networks. *Curr. Biol.* **17**, 341–346 (2007).
- 122   14. Toju, H., Tanabe, A. S. & Ishii, H. S. Ericaceous plant–fungus network in a harsh alpine–subalpine  
123       environment. *Mol. Ecol.* **25**, 3242–3257 (2016).
- 124   15. Benjamini, Y. & Hochberg, Y. Controlling the False Discovery Rate: A Practical and Powerful  
125       Approach to Multiple Testing. *J. R. Stat. Soc. Ser. B Methodol.* **57**, 289–300 (1995).
- 126   16. Anderson, M. J. A new method for non-parametric multivariate analysis of variance. *Austral Ecol.*  
127       **26**, 32–46 (2001).
- 128
- 129

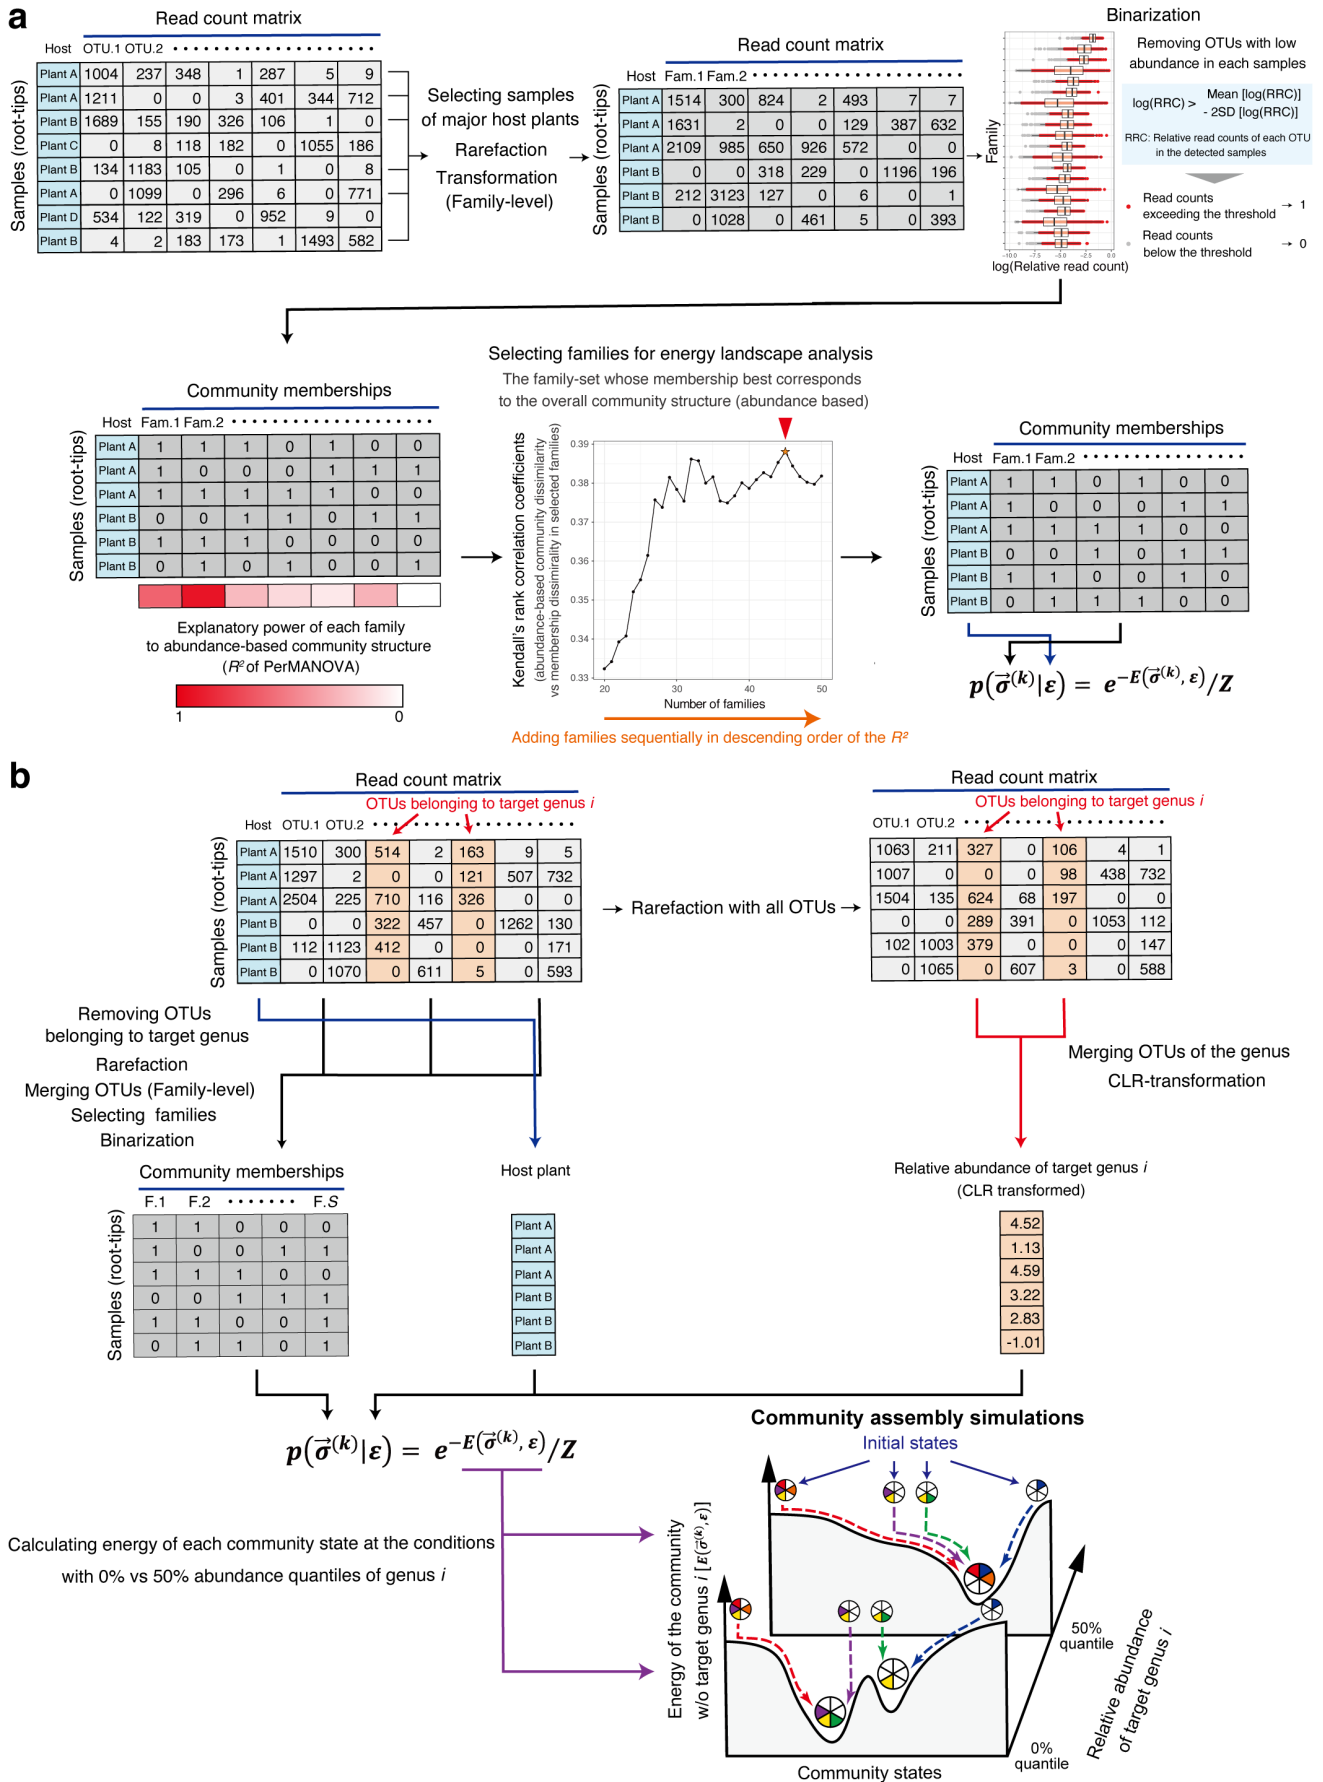

**Supplementary Fig. S1 | Workflow for energy landscape analysis and evaluation of “keystoneness”** (a) Input data for energy landscape analysis. We performed coverage-based

133 rarefaction for the root samples. In a matrix of family-level taxonomic compositions, relative read  
134 counts of each family were binarized with a threshold described in Methods and Supplementary  
135 Figure S2. To make the subsequent statistical analysis (energy landscape analysis) computationally  
136 feasible, we prioritized and selected families based on their contribution to overall community  
137 structure, evaluated by PerMANOVA ( $R^2$ ; Supplementary Tables S1 and S2). The family set showing  
138 the highest correspondence between its binarized pattern and the abundance-based community  
139 structure was selected among candidate sets determined by their  $R^2$  values. Energy landscape analysis  
140 was then conducted using the family-set with host plant genera (encoded as dummy variables) as  
141 explanatory variables. **(b)** Input data for the keystone exploration. From the original data matrix  
142 excluding OTUs annotated as a focal genus, coverage-based rarefaction was conducted. Binarization  
143 was applied to the same set of families as in **(a)**. In parallel, the whole community matrix was rarefied,  
144 and the genus-level compositions were subjected to CLR transformation. Energy landscape analysis  
145 was performed by including host plant genera (dummy variables) and CLR-transformed relative read  
146 counts (+1) of the focal genus as external factors. Two types of indices for identifying potential  
147 keystone taxa were calculated by comparing the landscape topography inferred in the absence of the  
148 focal species/taxon with that estimated under the assumption of an intermediate abundance level  
149 (25%, 50%, or 75% quantiles of abundance across samples in which the focal taxon was present) (Fig.  
150 1g).

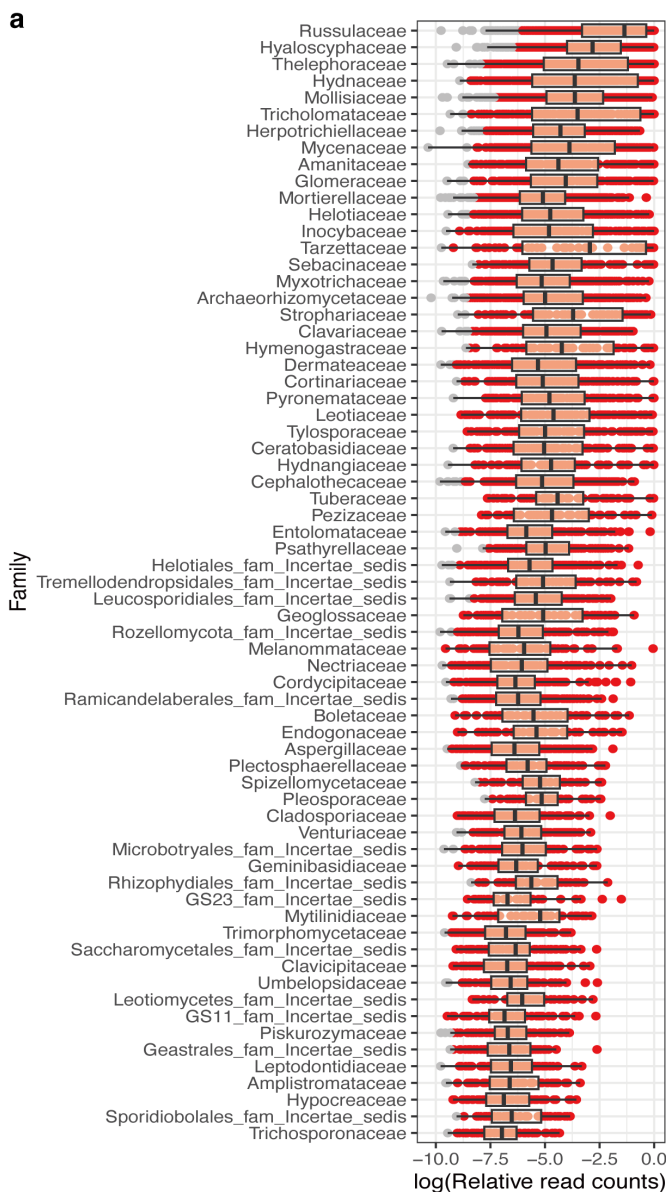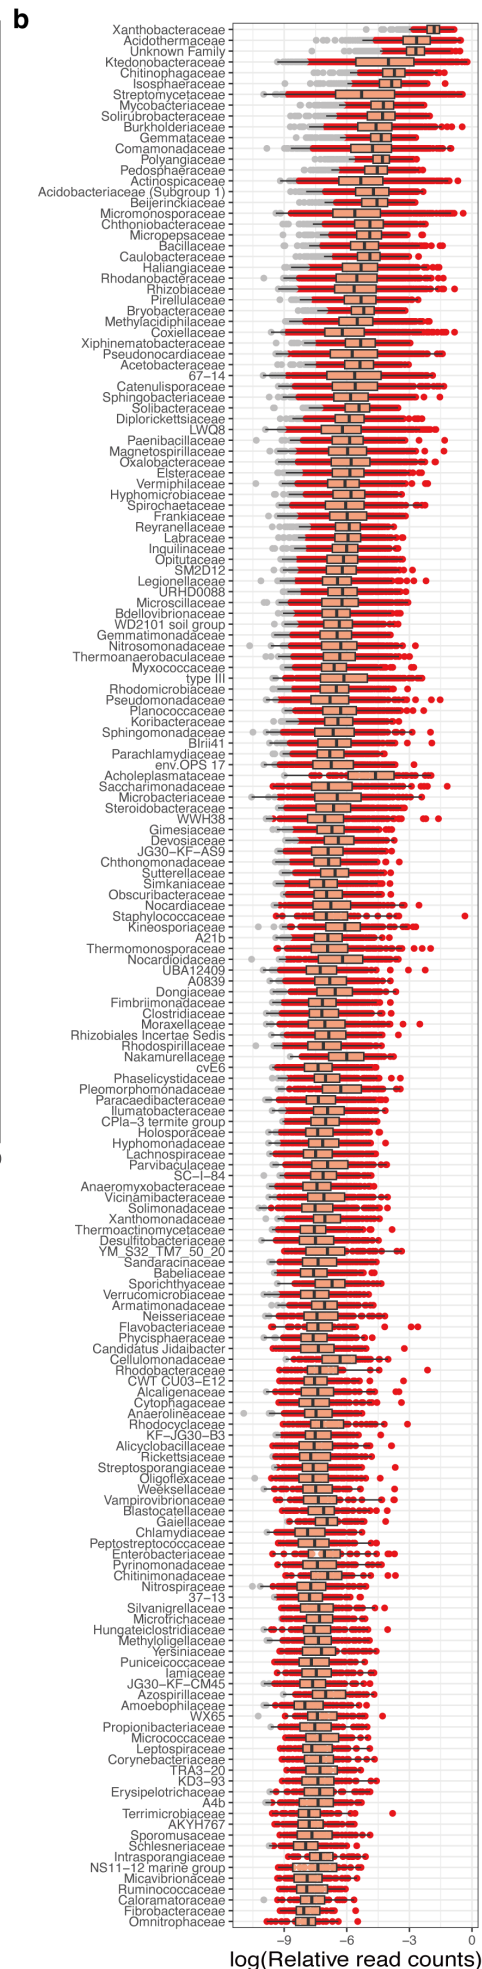

Binarization thresholds for energy landscape analysis

$$\log(\text{RRC}) > \text{Mean} [\log(\text{RRC})] - 2\text{SD} [\log(\text{RRC})]$$

RRC: Relative read counts of each OTU  
in the detected samples

Read counts exceeding the threshold (red dot)  
Read counts below the threshold (grey dot)

152 **Supplementary Fig. S2 | Relative abundances of microbial families** | (a) Distribution of relative  
153 read counts of each fungal family in samples from which it was detected. To remove potential  
154 sequencing contaminants, the threshold for binarization was defined for each family as  $\text{Mean} [\log$   
155  $(\text{RRC})] - 2\text{SD} [\log (\text{RRC})]$ , where  $\text{Mean} [\log (\text{RRC})]$  and  $\text{SD} [\log (\text{RRC})]$  denote the mean and  
156 standard deviation of the log-transformed relative read counts of the focal family, respectively. (b)  
157 Distribution of relative read counts for each prokaryotic family.

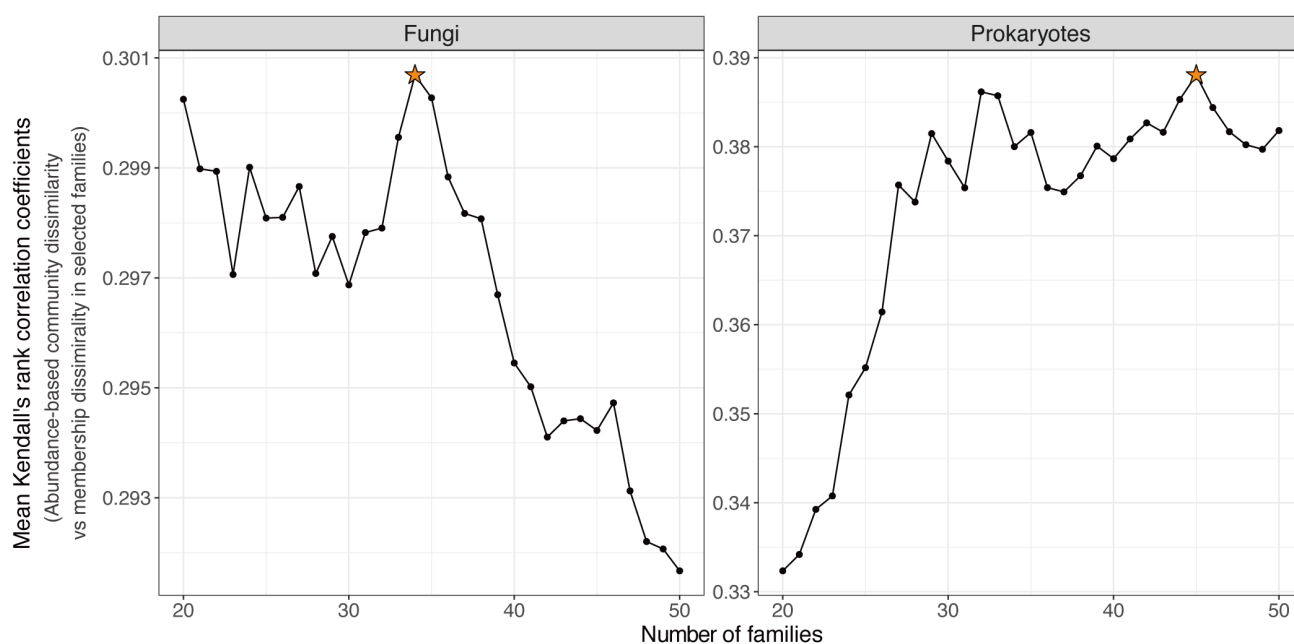

**Supplementary Fig. S3 | Selecting optimal family sets for energy landscape analysis.** The optimal sets (numbers) of fungal and prokaryotic families were determined to best preserve the information contained in the original community data during the filtering process for energy landscape analysis (see Supplementary Fig. S1 and Methods for details). Specifically, to make the exploration of optimal fungal and prokaryotic family sets computationally feasible, we first ordered 50 families based on their explanatory power for the overall community structure ( $R^2$  in the PerMANOVA; see Supplementary Tables S1 and S2). We then evaluated the correlations between community dissimilarity values calculated from the binarized data of each candidate family set (Jaccard distance) and those calculated from the original relative abundance data (Bray–Curtis distance). The selected fungal and prokaryotic family sets are indicated by star-shaped symbols.

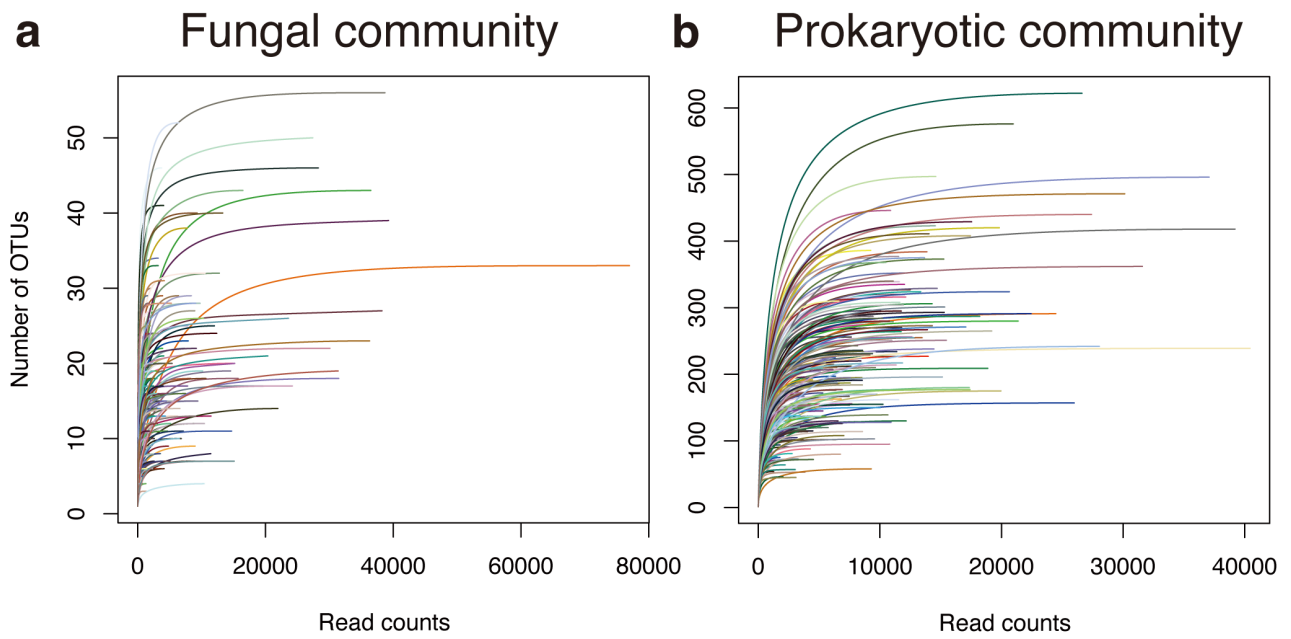

**Supplementary Fig. S4 | Rarefaction curves. (a)** Number of fungal OTUs detected in root samples. For visualization, the relationships between the number of sequencing reads and the number of fungal OTUs detected in 200 randomly selected samples are shown. **(b)** Number of prokaryotic OTUs.

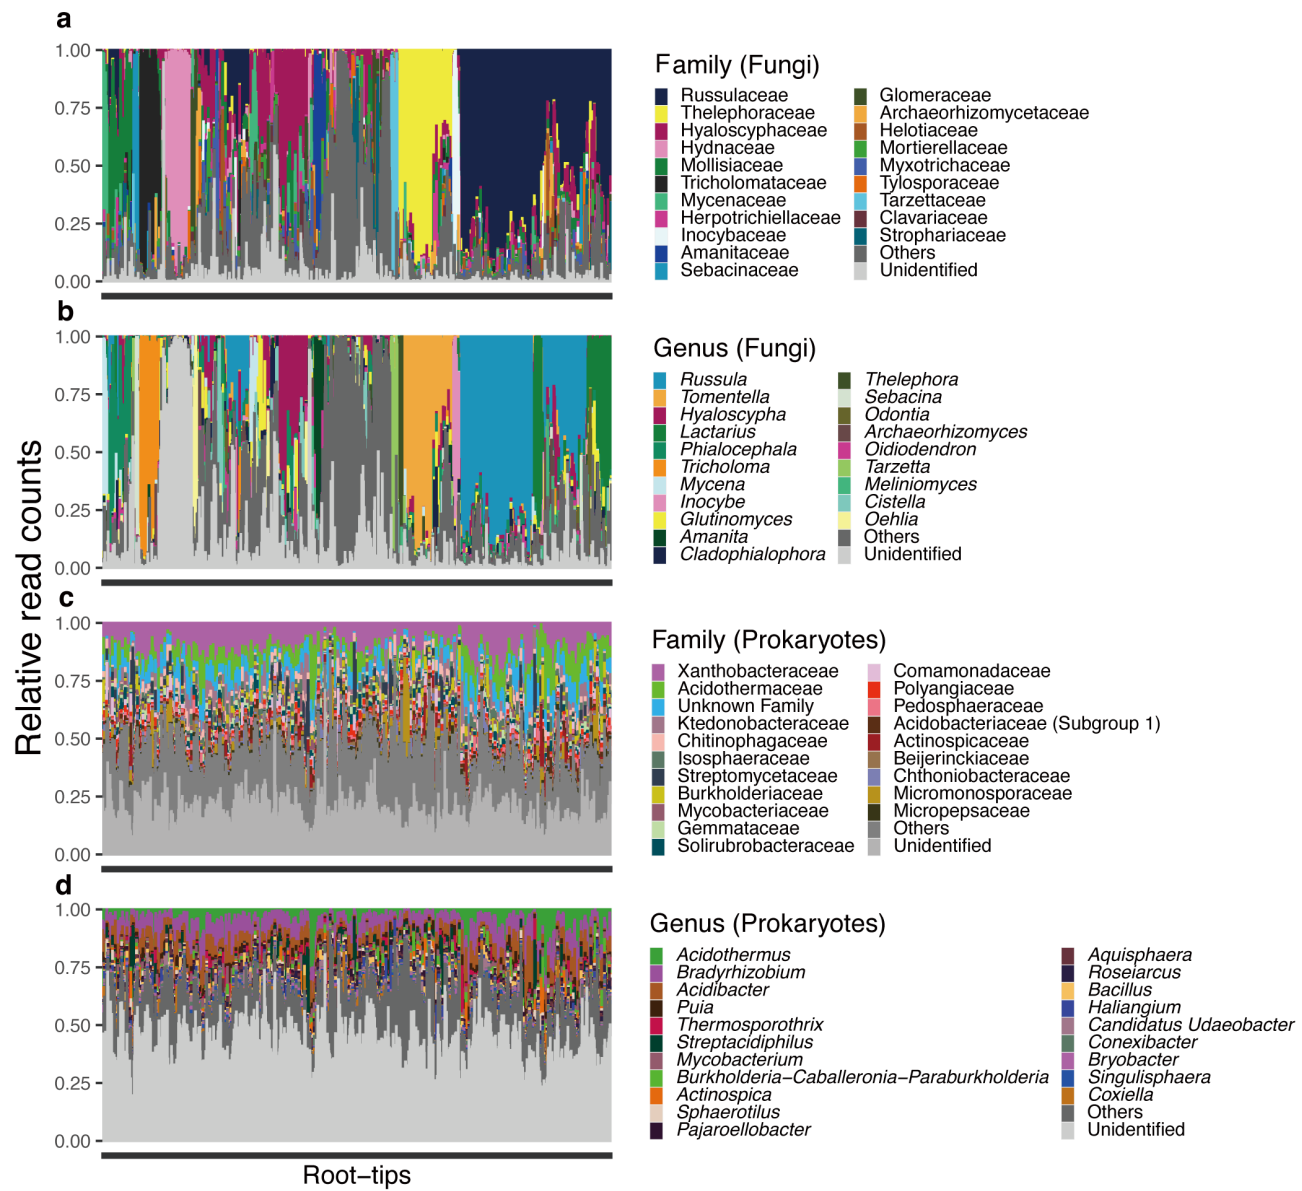

176

177

178

179

180

**Supplementary Fig. S5 | Fungal and prokaryotic community compositions. (a)** Family-level taxonomic compositions of fungal communities across 1,270 root-tip samples. **(b)** Genus-level taxonomic compositions of fungal communities. **(c)** Family-level taxonomic compositions of prokaryotic communities. **(d)** Genus-level taxonomic compositions of prokaryotic communities.

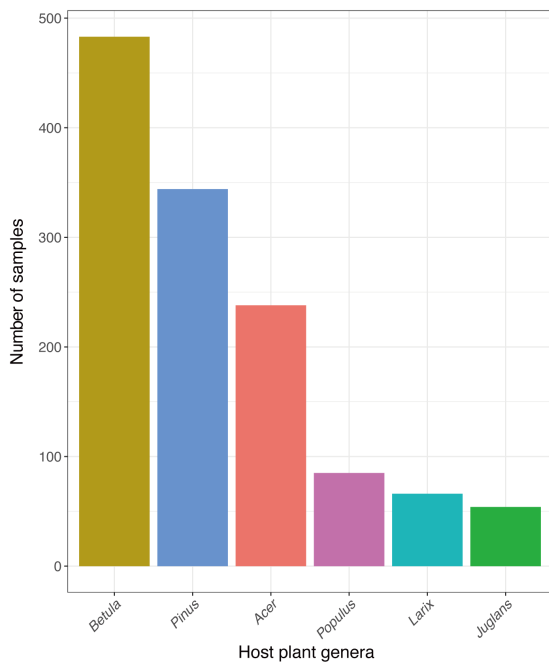

**Supplementary Fig. S6 | Number of the samples from each host plant.** The sample size of each host plant genera used in energy landscape analysis is shown. After a series of quality filtering, 1,270 root samples identified as those of major six plant genera (i.e., plant genera with more than 50 samples) were used in the statistical analysis.

10 Higher preference  
5  
0  
-5 Higher avoidance

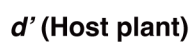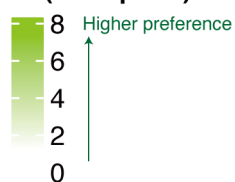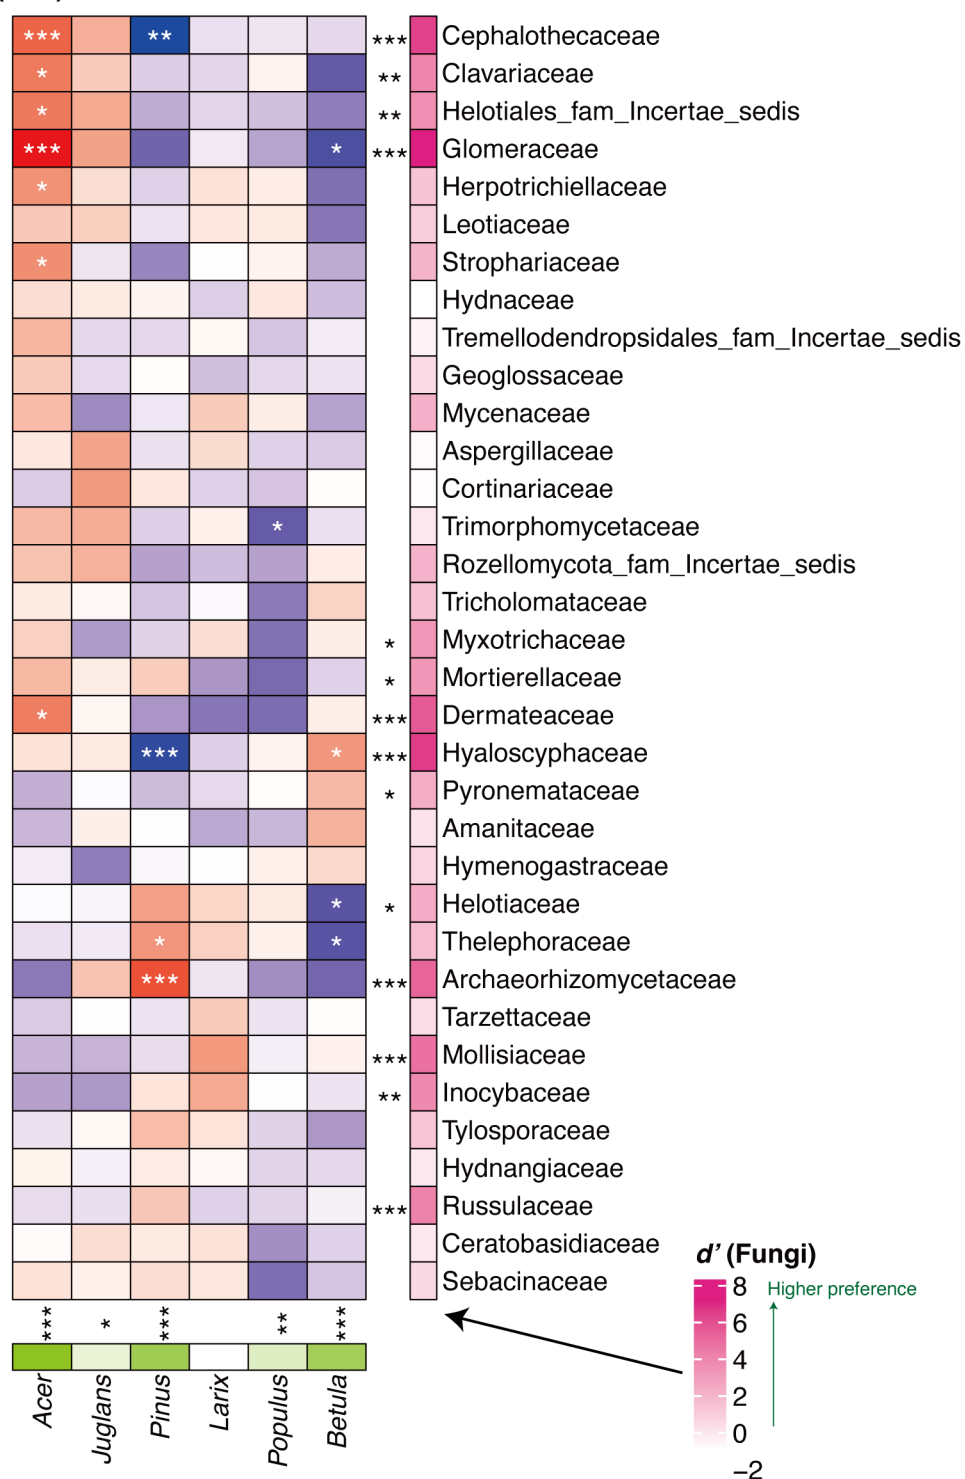

**Supplementary Fig. S7 | Preferences in plant–fungus associations.** Host preferences of the fungal families analyzed in the energy landscape analysis (rows) and symbiont preferences of the six host plant genera (column) are shown as  $z$ -standardized  $d'$  estimates. In addition, specificity of each host–symbiont pair is represented with a two-dimensional preference ( $2DP$ ) estimate in the matrix heatmap, which indicates the extent to which the association of a target plant–fungal pair is observed more or less frequently than expected by chance. Significance of the  $z$ -standardized  $d'$  (one-tailed test) and  $2DP$  estimates (two-tailed test) are evaluated with the null model simulations (See Supplementary Methods; \*\*\*,  $P(FDR) < 0.001$ ; \*\*,  $P(FDR) < 0.01$ ; \*,  $P(FDR) < 0.05$ ). The relationship between the  $2DP$  estimates and FDR-corrected  $P$  values are also shown in the left-side panel.

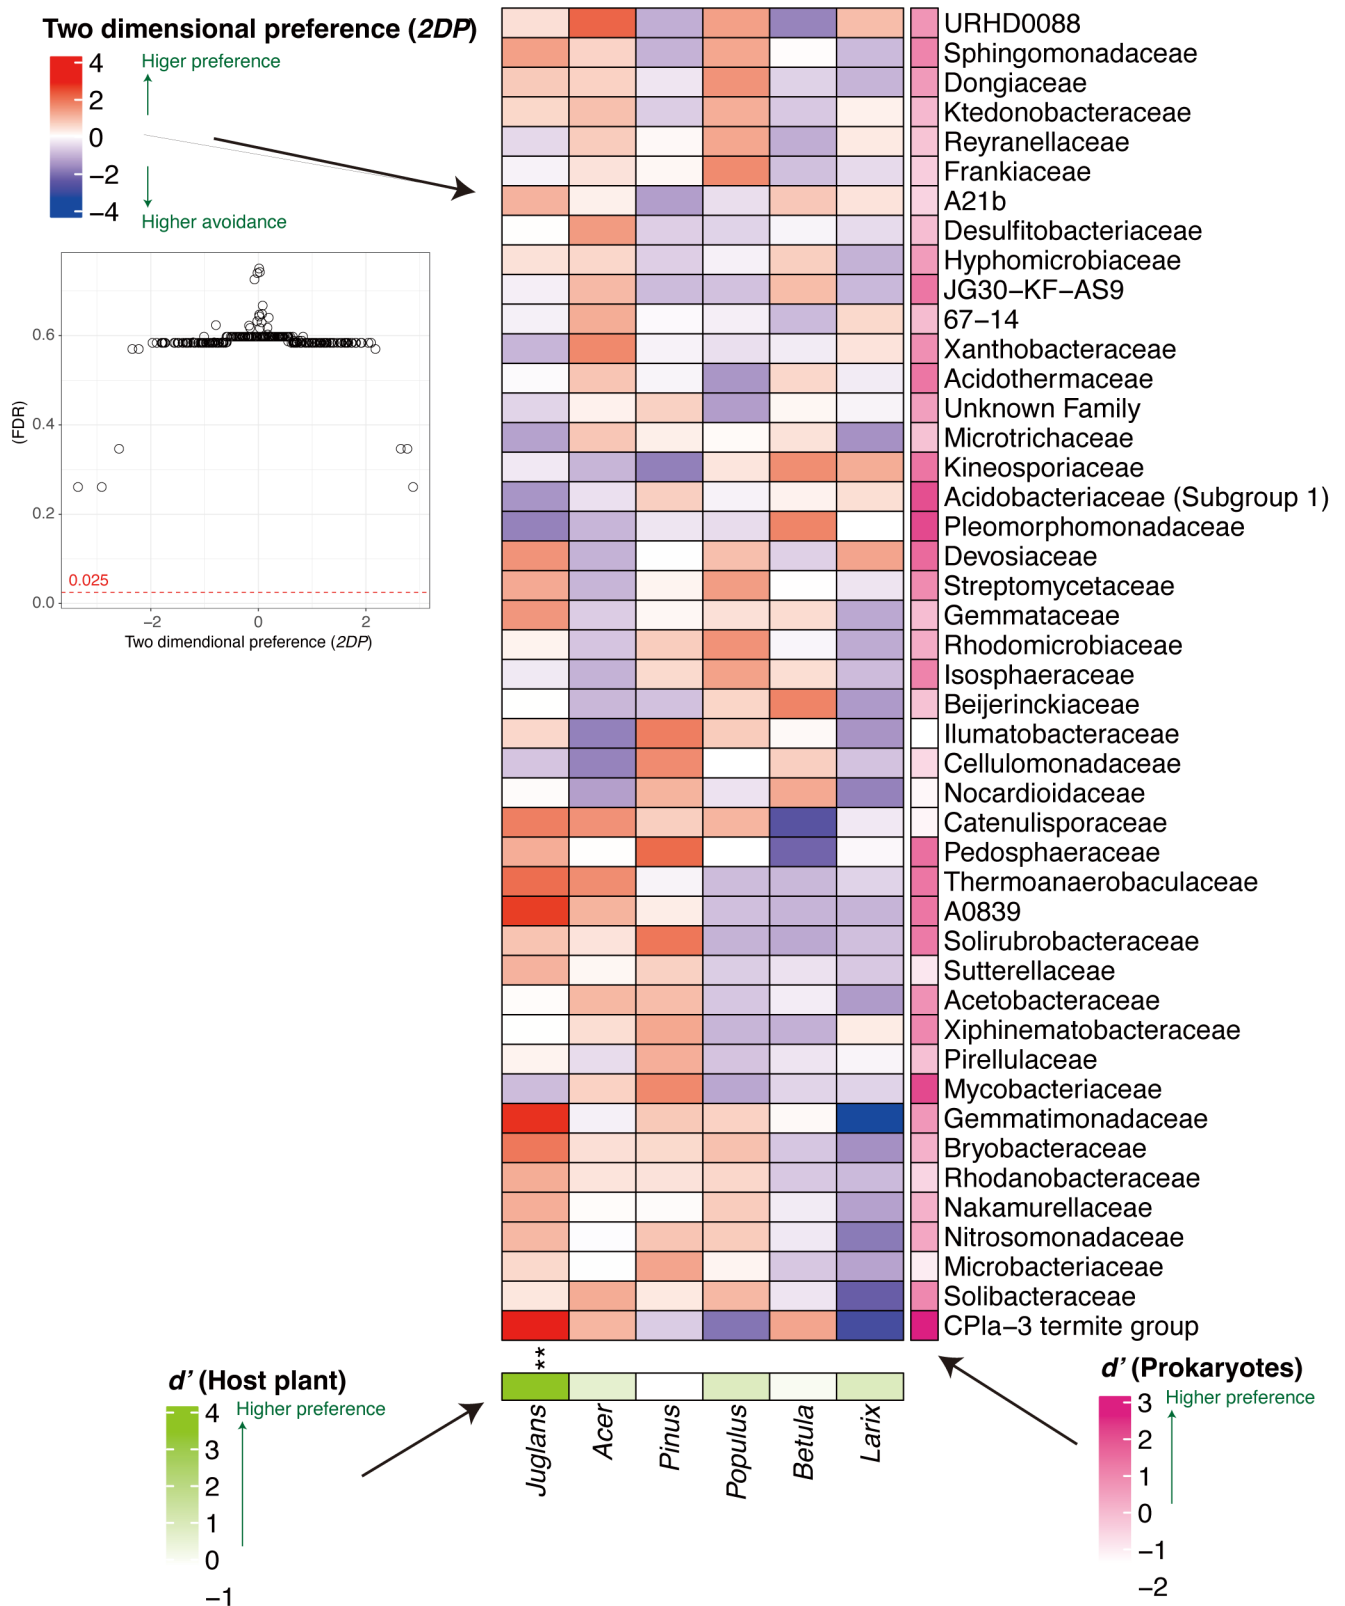

**Supplementary Fig. S8 | Preferences in plant-prokaryote associations.** Host preferences of the prokaryotic families analyzed in the energy landscape analysis (rows) and symbiont preferences of the six host plant genera (column) are shown with the z-standardized  $d'$  estimates. In addition, specificity of each host-symbiont pair is represented with a two-dimensional preference (2DP) estimate in the matrix heatmap, which indicates the extent to which the association of a target plant-prokaryote pair

204 is observed more or less frequently than expected by chance. Significance of the z-standardized  $d'$   
205 (one-tailed test) and  $2DP$  estimates (two-tailed test) are evaluated with the null model simulations  
206 (See Supplementary Methods; \*\*\*,  $P(FDR) < 0.001$ ; \*\*,  $P(FDR) < 0.01$ ; \*,  $P(FDR) < 0.05$ ). The  
207 relationship between the  $2DP$  estimates and FDR-corrected  $P$  values are also shown in the left-side  
208 panel.

209

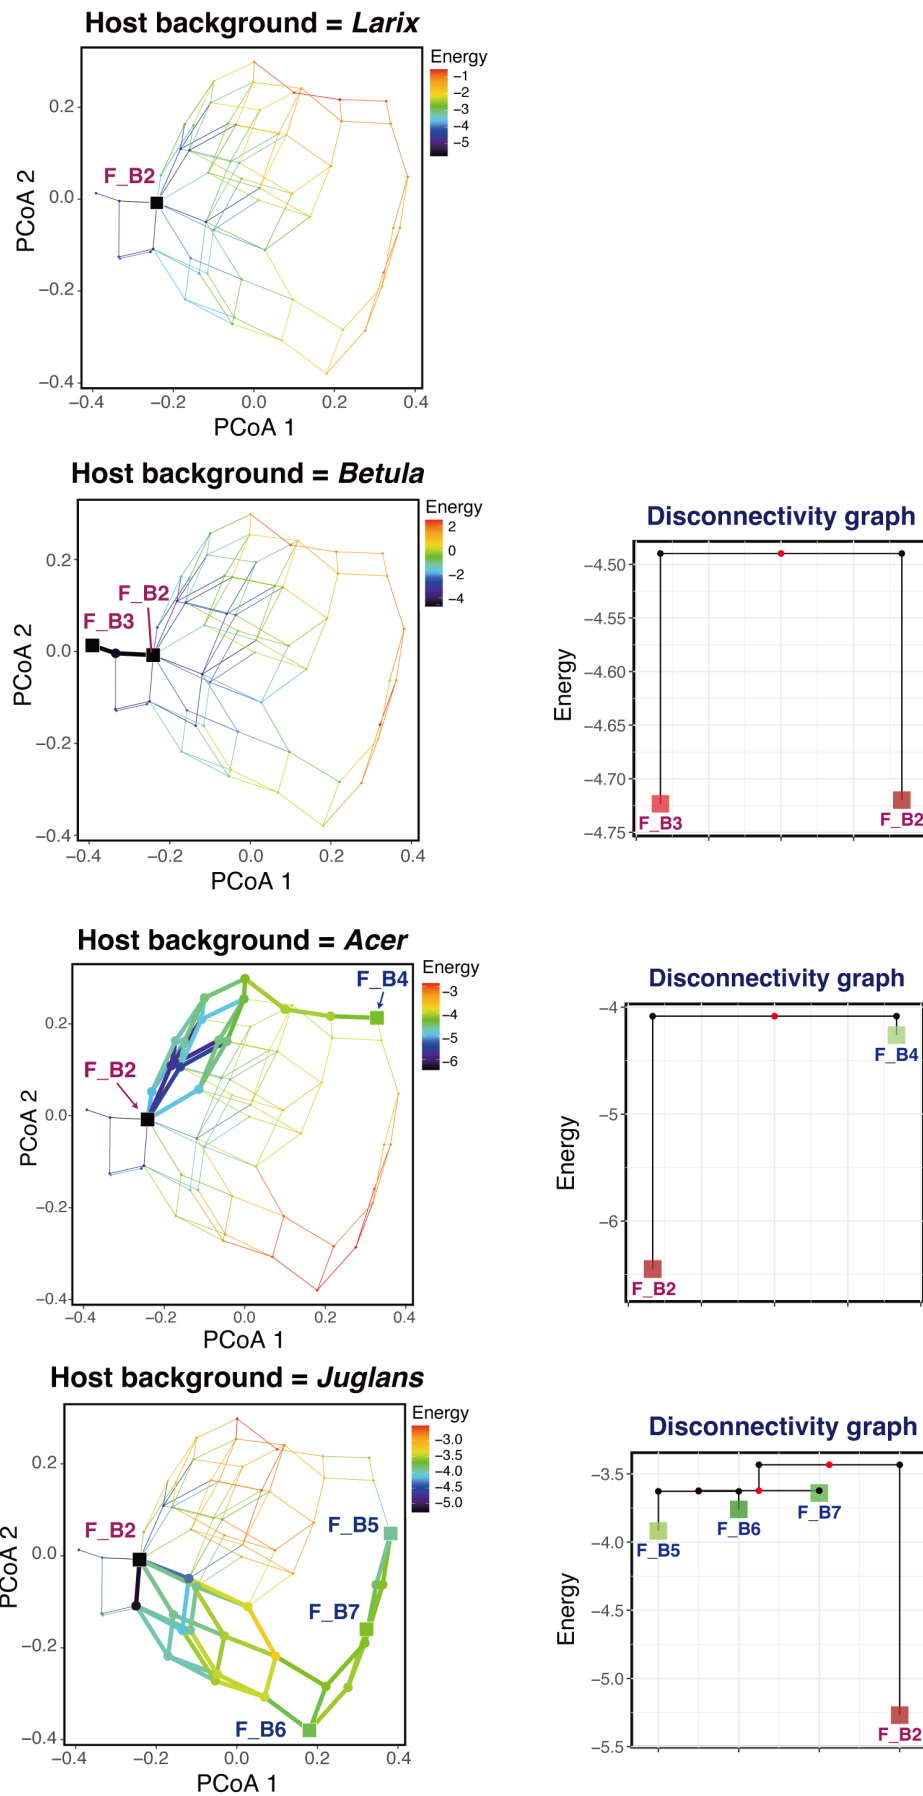

210  
 211 **Supplementary Fig. S9 | Energy landscapes of the fungal community inferred by assuming**  
 212 ***Larix*, *Betula*, *Acer* or *Juglans* host-plant backgrounds.** The identity of host plants is included as an

213 explicit factor in the statistical model (Fig. 1b). We calculate energy of each community state and  
214 reconstructed energy-weighted assembly graph in each host-plant background. The basin bottoms  
215 (squares), the intermediate states (circles) and the lowest-energy transition pathways between them  
216 (thick lines) are visualized on the PCoA surface representing community states. Pathways and  
217 intermediates states for the basin bottoms inferred in other host-plant backgrounds are shown by thin  
218 lines and small circles, respectively. The "energy" of basin bottoms and boundary states between them  
219 is detailed in the "disconnectivity graphs".

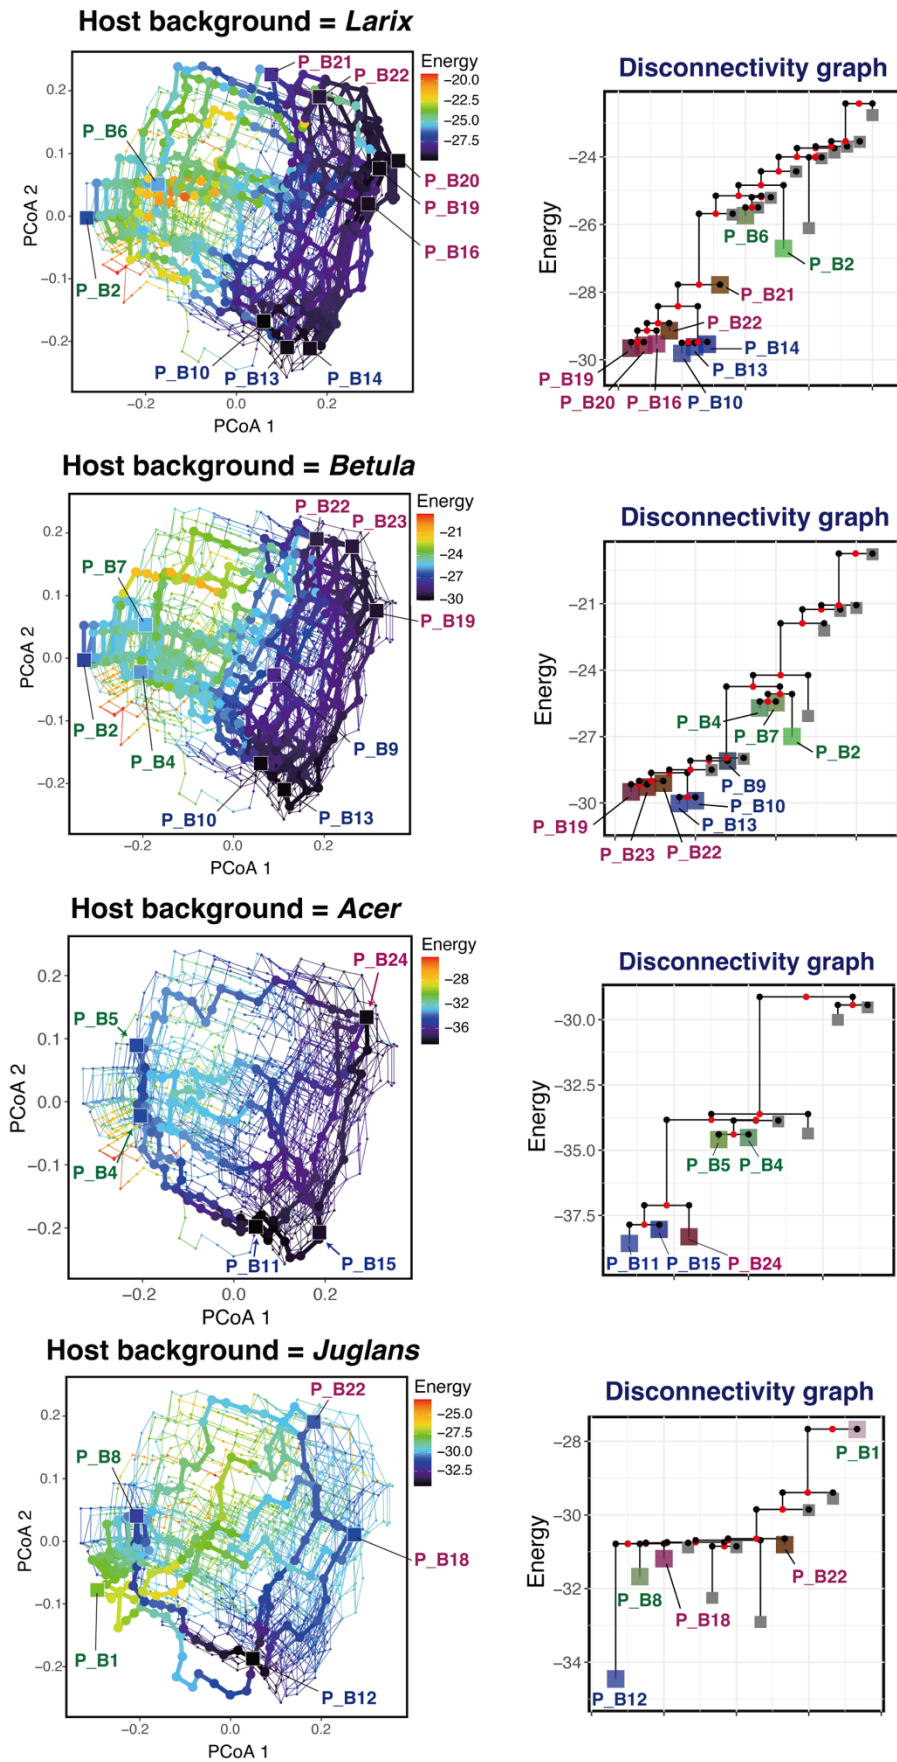

220

221

222

**Supplementary Fig. S10 | Energy landscapes of the prokaryotic community inferred by assuming *Larix*, *Betula*, *Acer* or *Juglans* host-plant backgrounds. The identity of host plants is**

223 included as an explicit factor in the statistical model (Fig. 1b). We calculate energy of each  
224 community state and reconstructed energy-weighted assembly graph in each host-plant background.  
225 The basin bottoms (squares), the intermediate states (circles) and the lowest-energy transition  
226 pathways between them (thick lines) are visualized on the PCoA surface representing community  
227 states. Pathways and intermediates states for the basin bottoms inferred in other host-plant  
228 backgrounds are shown by thin lines and small circles, respectively. The "energy" of basin bottoms  
229 and boundary states between them is detailed in the "disconnectivity graphs".

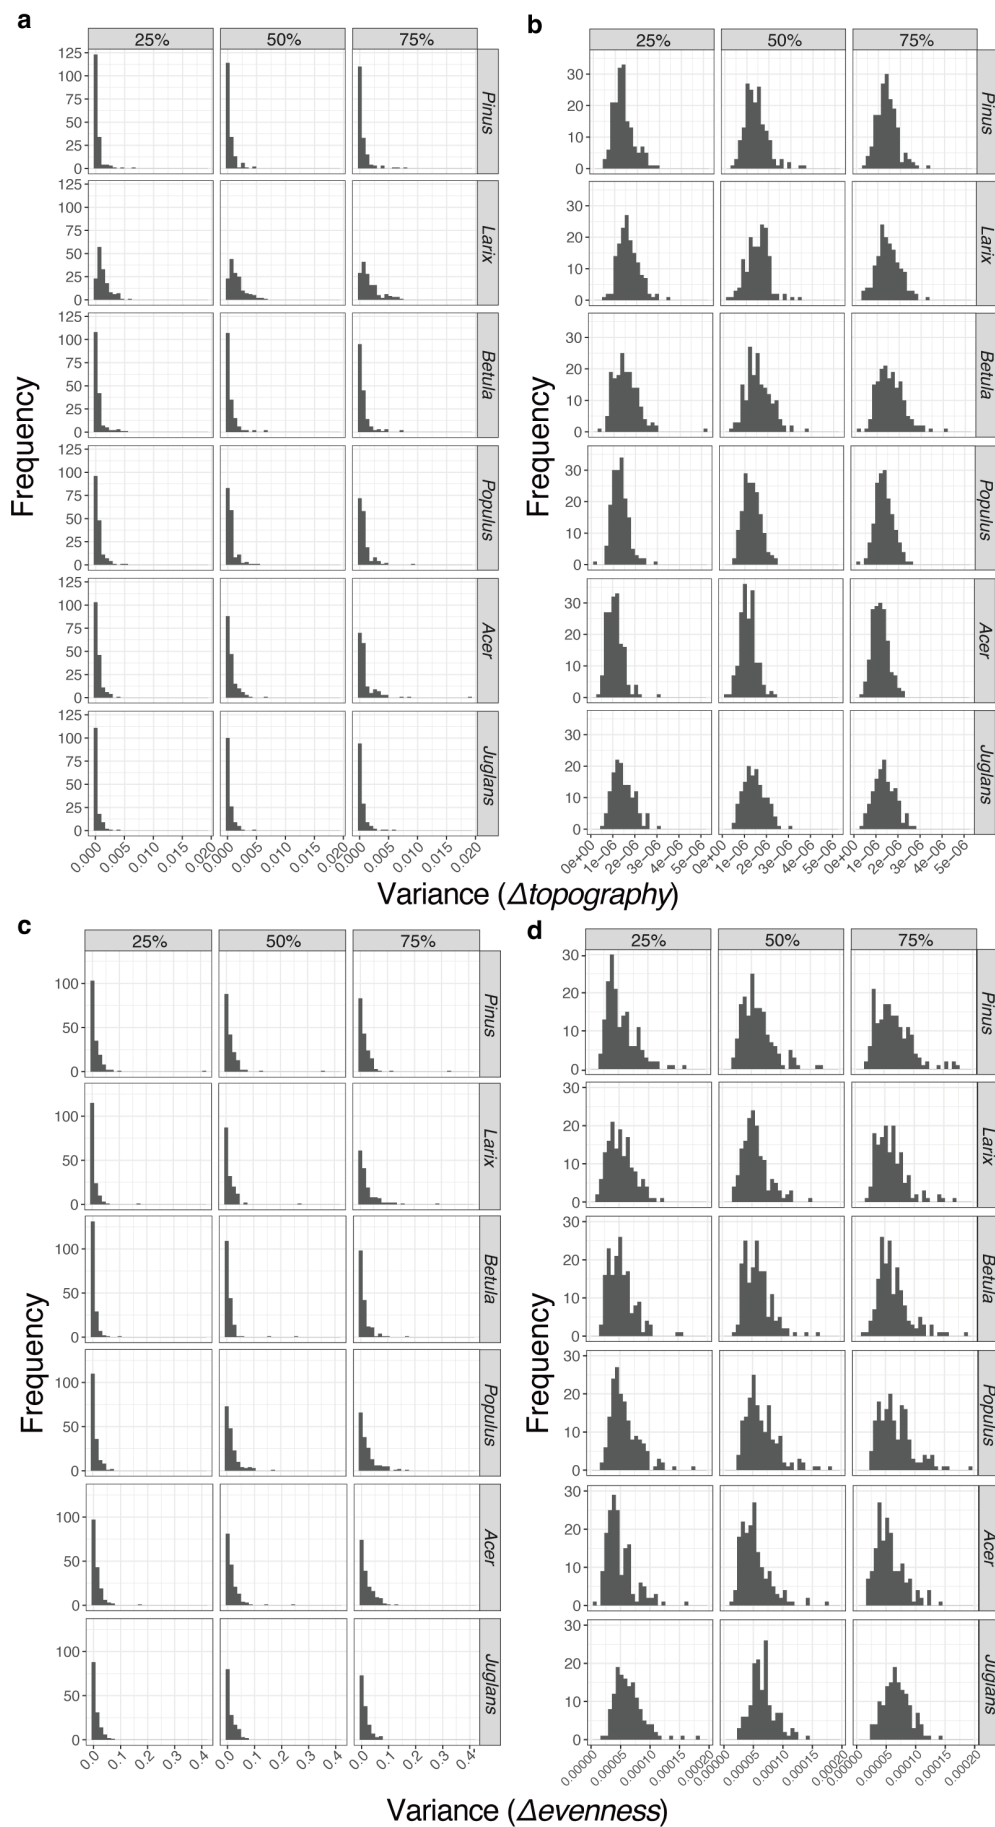

230

231 **Supplementary Fig. S11 | Histograms of the estimation variances in “keystoneness” metrics.**

232 The *Δtopography* and *Δevenness* values of each genus analyzed in Figure 4 were recalculated 30 times  
233 using different sets of 20,000 randomly initialized community states. Calculations were performed for  
234 each of the six host plants (rows), assuming different abundance quantile levels (columns; 25%, 50%,  
235 and 75% quantiles of relative read counts in samples in which the focal microbial taxon was present).  
236 **(a)** *Δtopography* for the fungal assembly landscape. **(b)** *Δtopography* for the prokaryotic assembly  
237 landscape. **(c)** *Δevenness* for the fungal assembly landscape. **(d)** *Δevenness* for the prokaryotic  
238 assembly landscape.

239

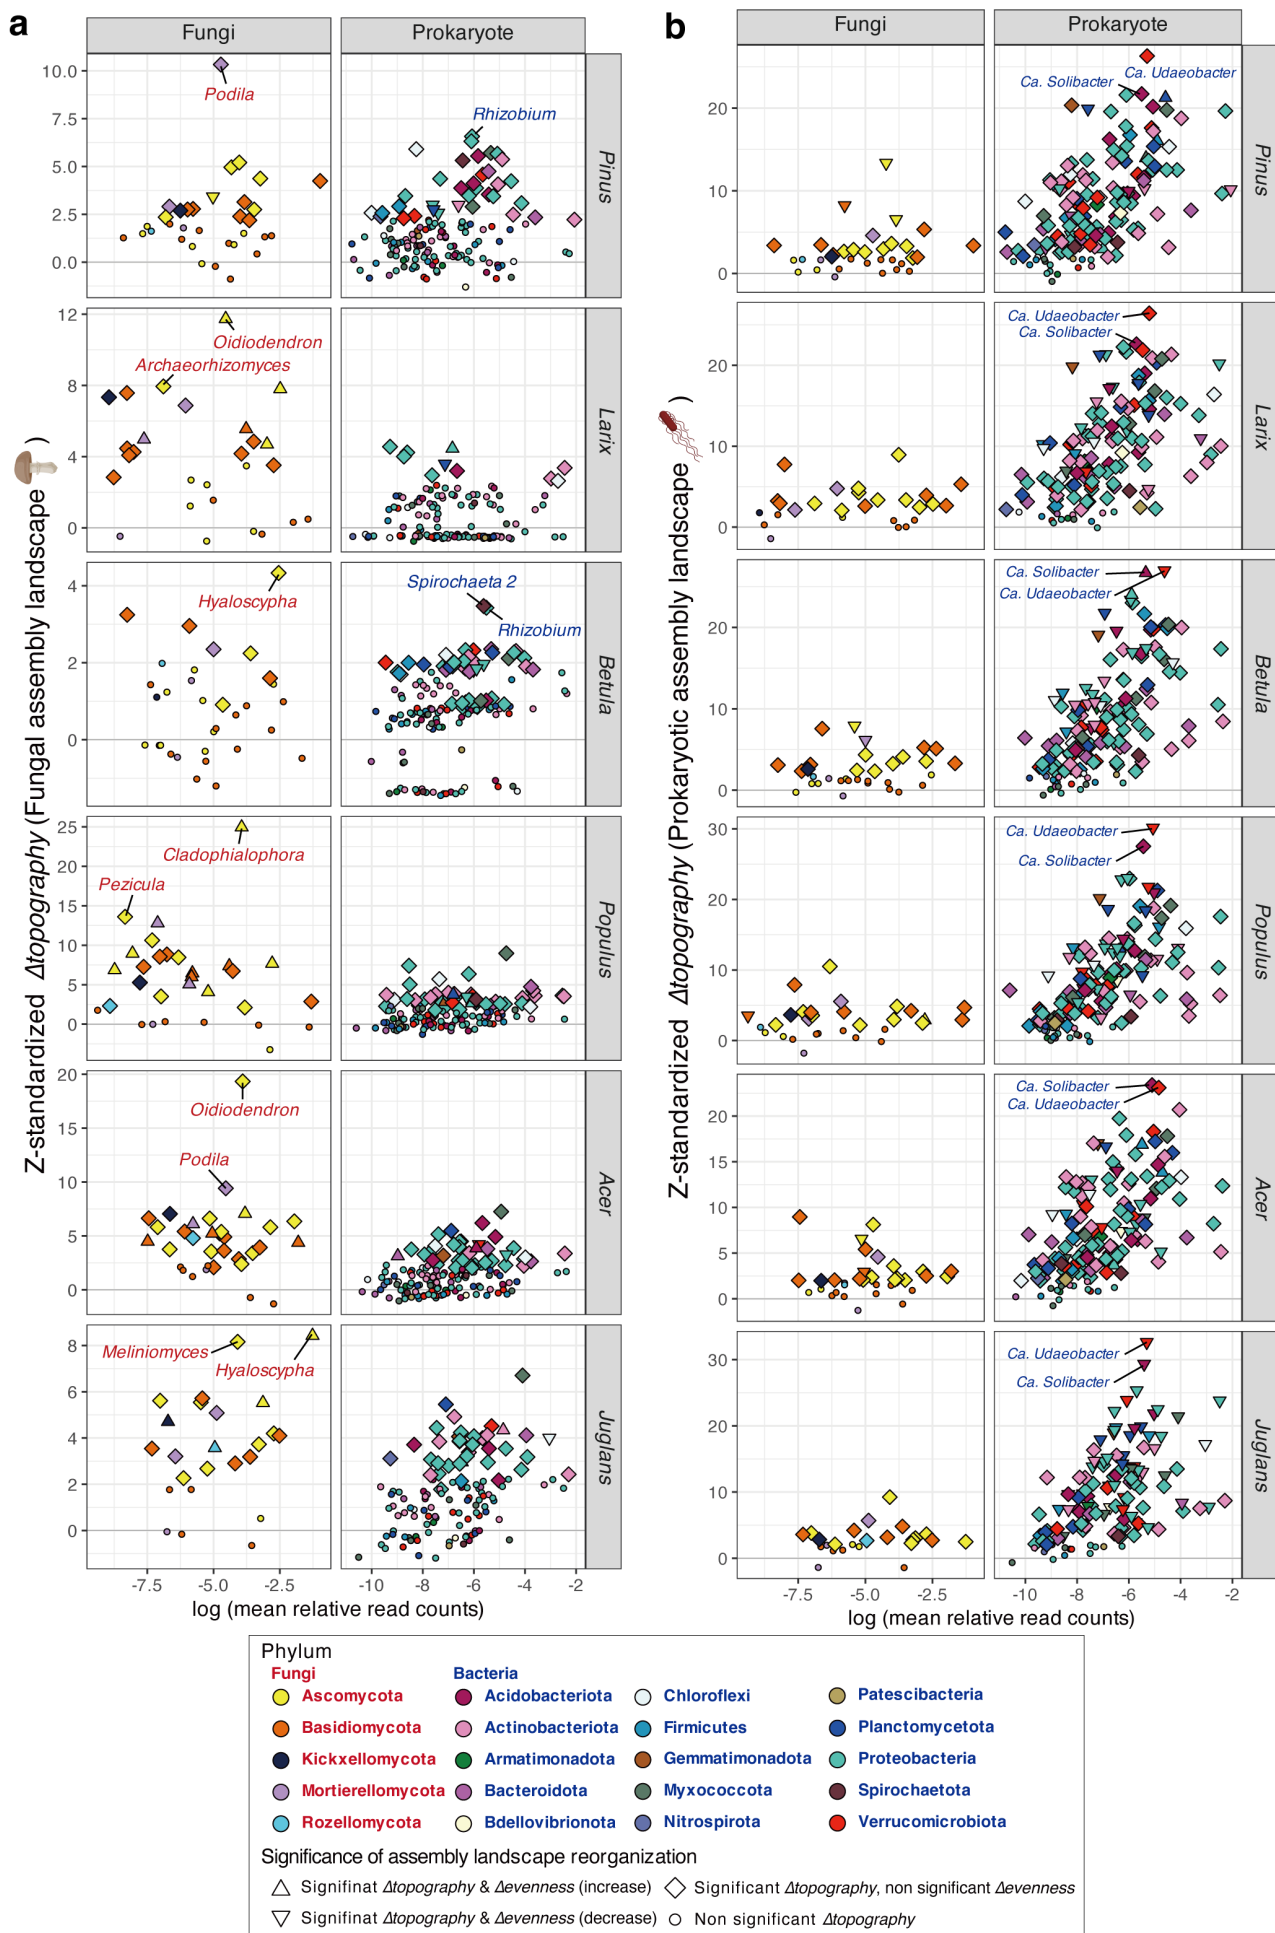

241 **Supplementary Fig. S12 | Potential impacts on the overall energy landscape architecture and the**  
242 **abundance of each microbial genus.** (a) Z-standardized *Δtopography* of individual microbial genera  
243 in fungal energy landscapes. Genera whose abundance changes are inferred to substantially reshape  
244 the fungal community destinations within the energy landscape are highlighted in each host-plant  
245 background. The effects of fungal and prokaryotic genera are presented separately (left-side panels:  
246 fungal genera, right-side panels: prokaryotic genera). (b) Z-standardized *Δtopography* of individual  
247 microbial genera in prokaryotic energy landscapes.

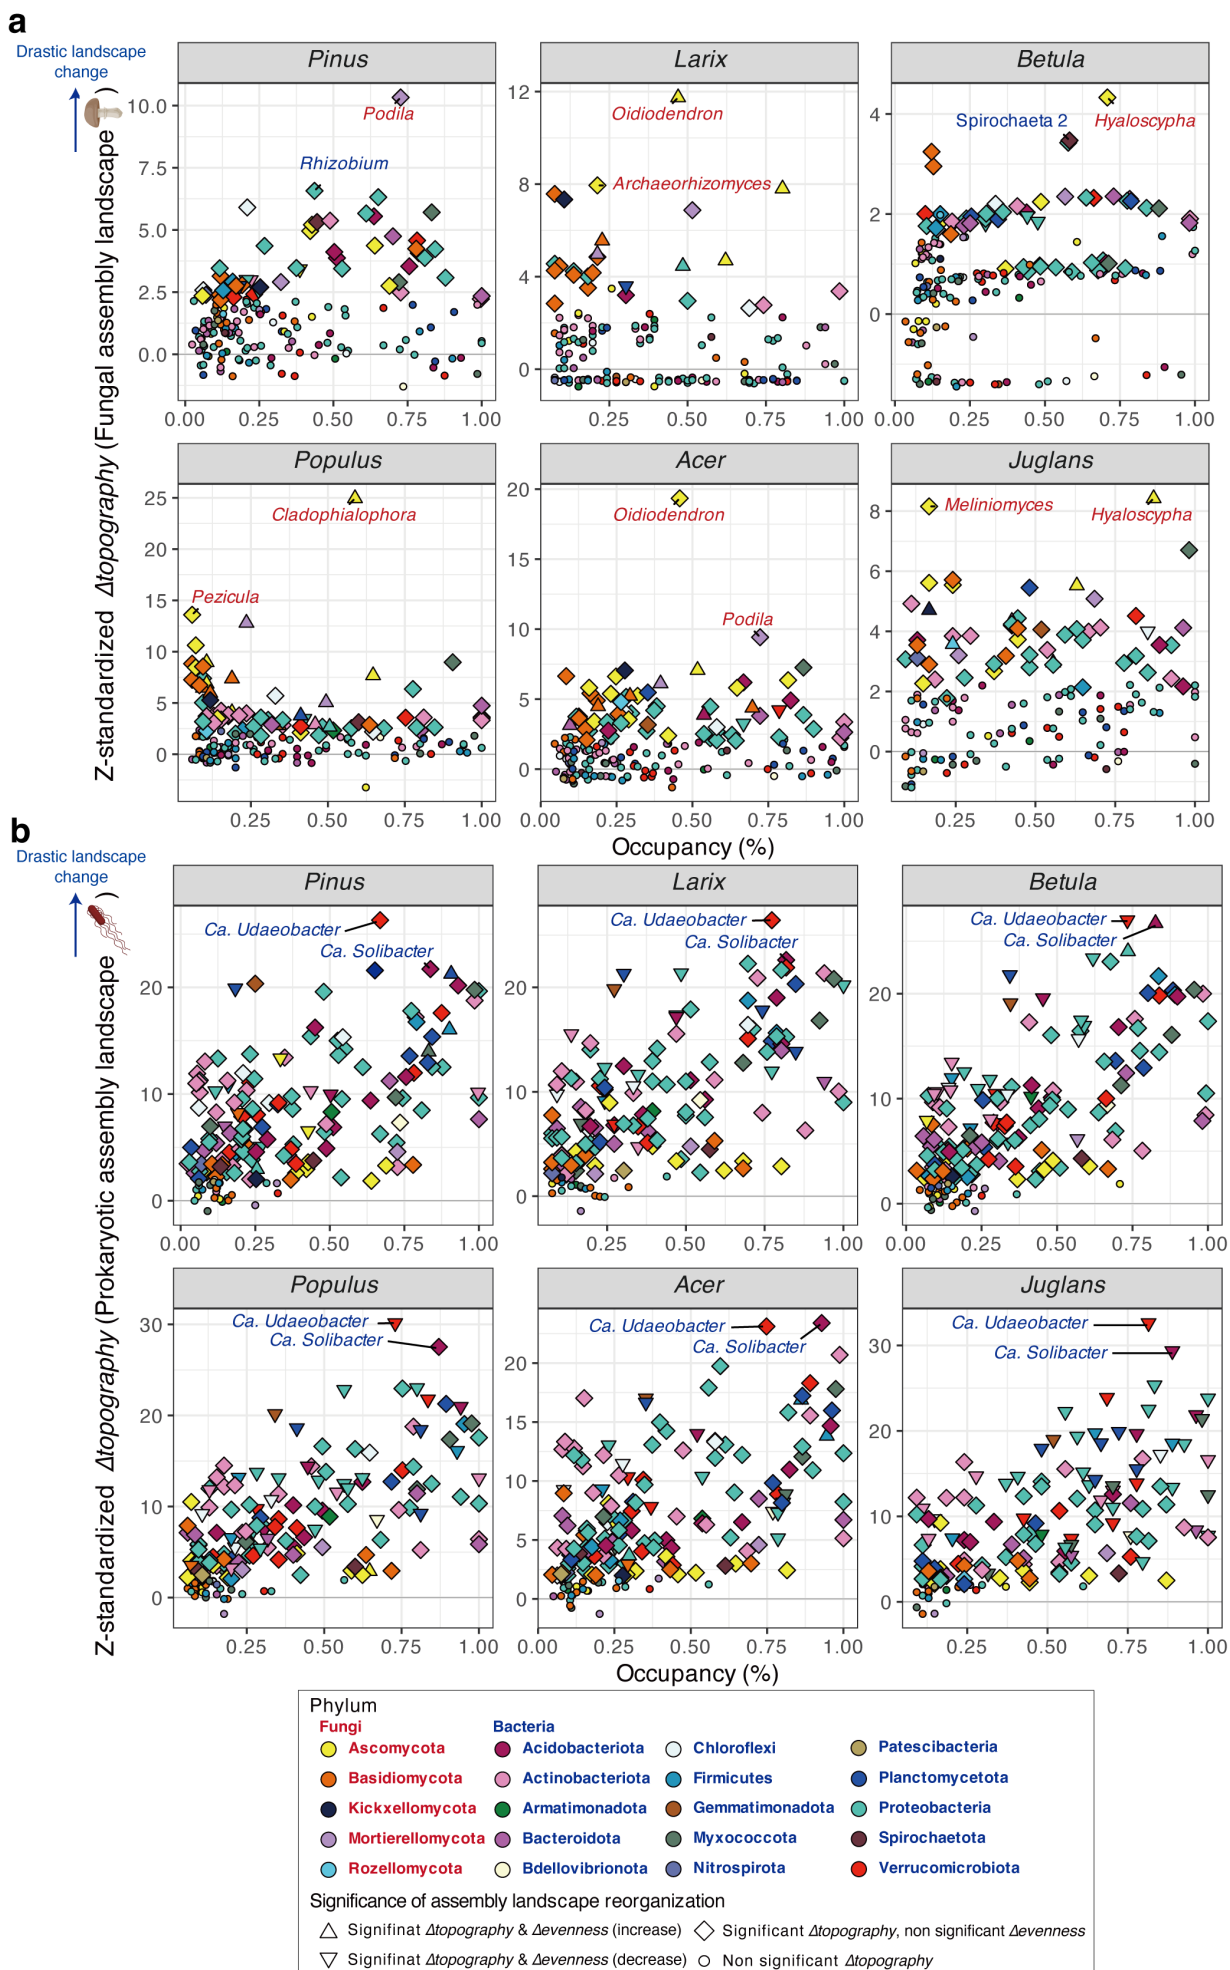

249 **Supplementary Fig. S13 | Potential impacts on the overall energy landscape architecture and the**  
250 **occupancy of each microbial genus. (a)** Z-standardized *Δtopography* of individual microbial genera  
251 in fungal energy landscapes. Genera whose abundance changes are inferred to substantially reshape  
252 the fungal community destinations within the energy landscape are highlighted in each host plant  
253 background. **(b)** Z-standardized *Δtopography* of individual microbial genera in prokaryotic energy  
254 landscapes.  
255

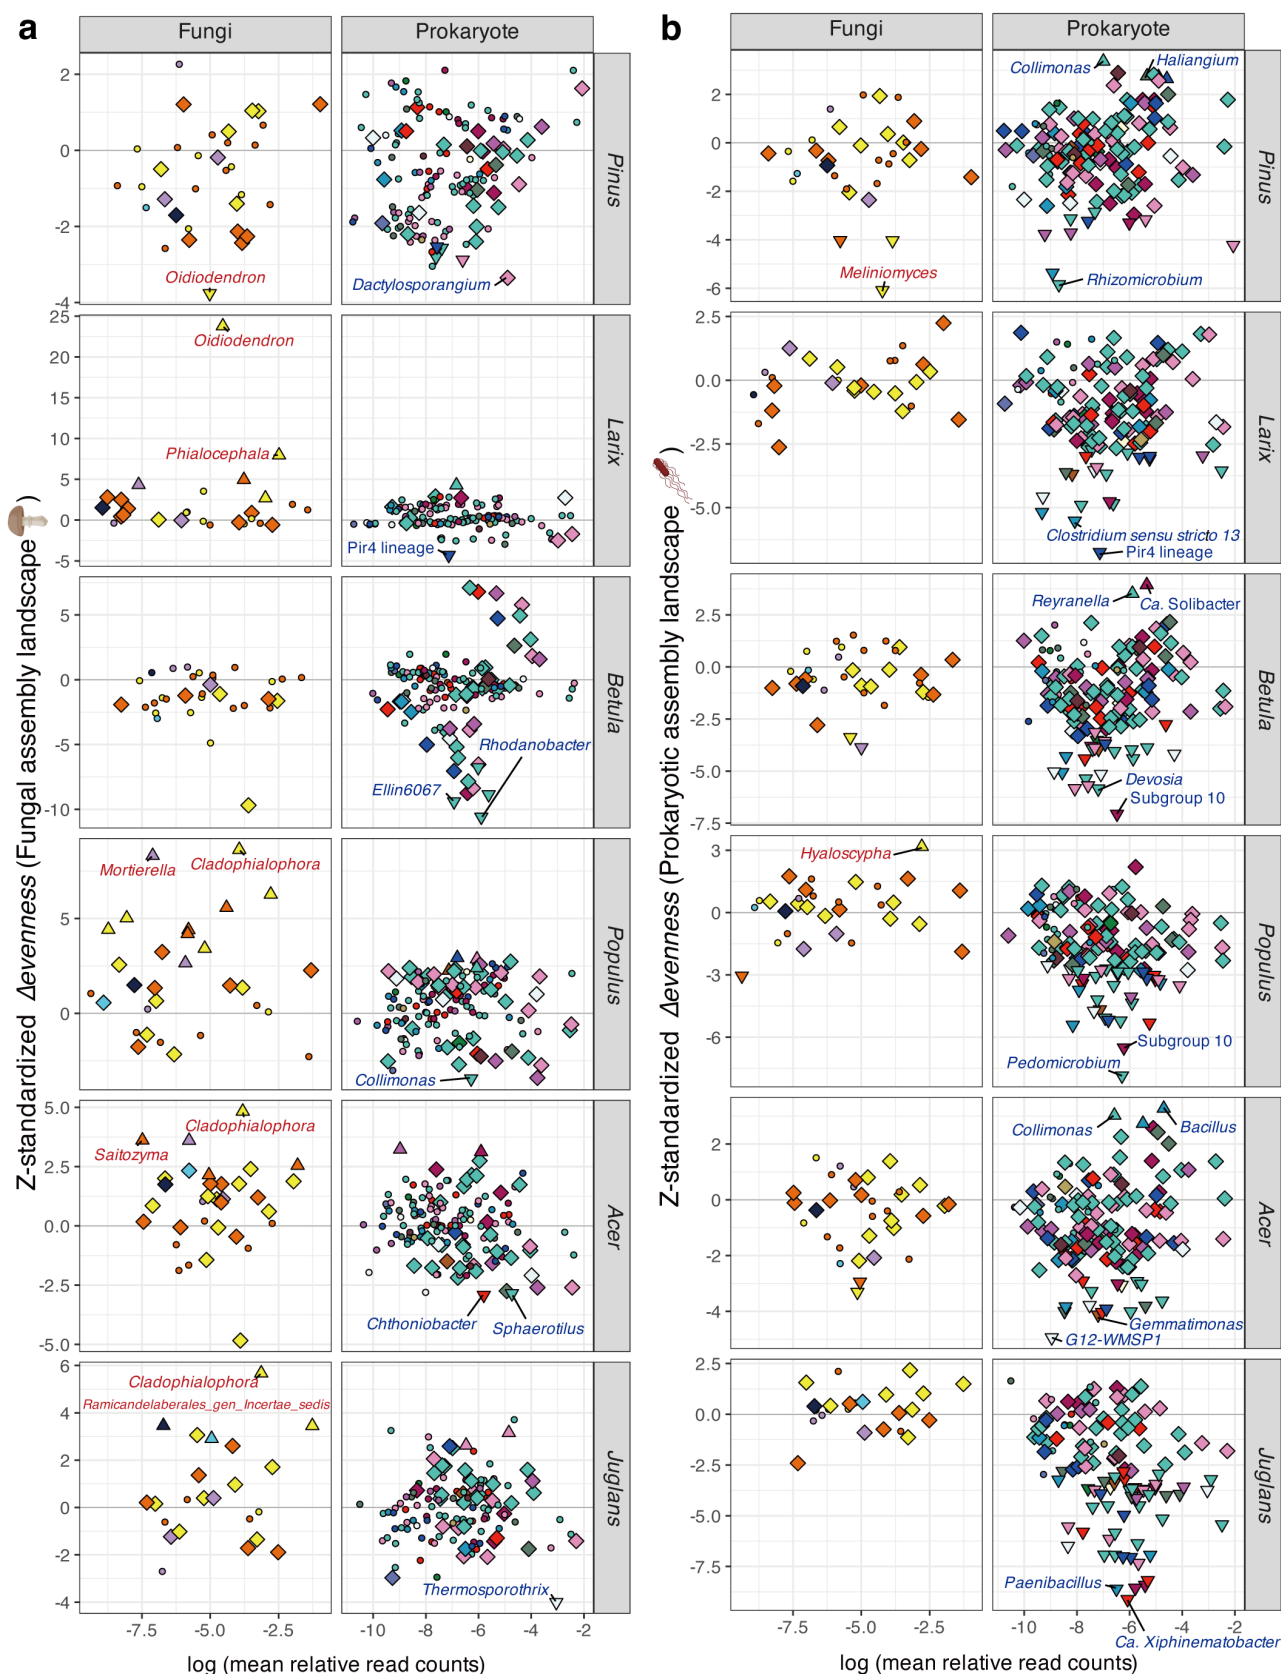

**Supplementary Fig. S14 | Potential impacts on the evenness of the basin distributions and the relative abundance of each microbial genus. (a)** Z-standardized *Δevenness* of individual microbial genera in fungal energy landscapes. Genera whose abundance changes are inferred to substantially alter the basin distributions and frequencies within the energy landscape are highlighted in each host plant background. The effects of fungal and prokaryotic genera are presented separately (left-side panels: fungal genera, right-side panels: prokaryotic genera). **(b)** Z-standardized *Δevenness* of individual microbial genera in prokaryotic energy landscapes.

**a**

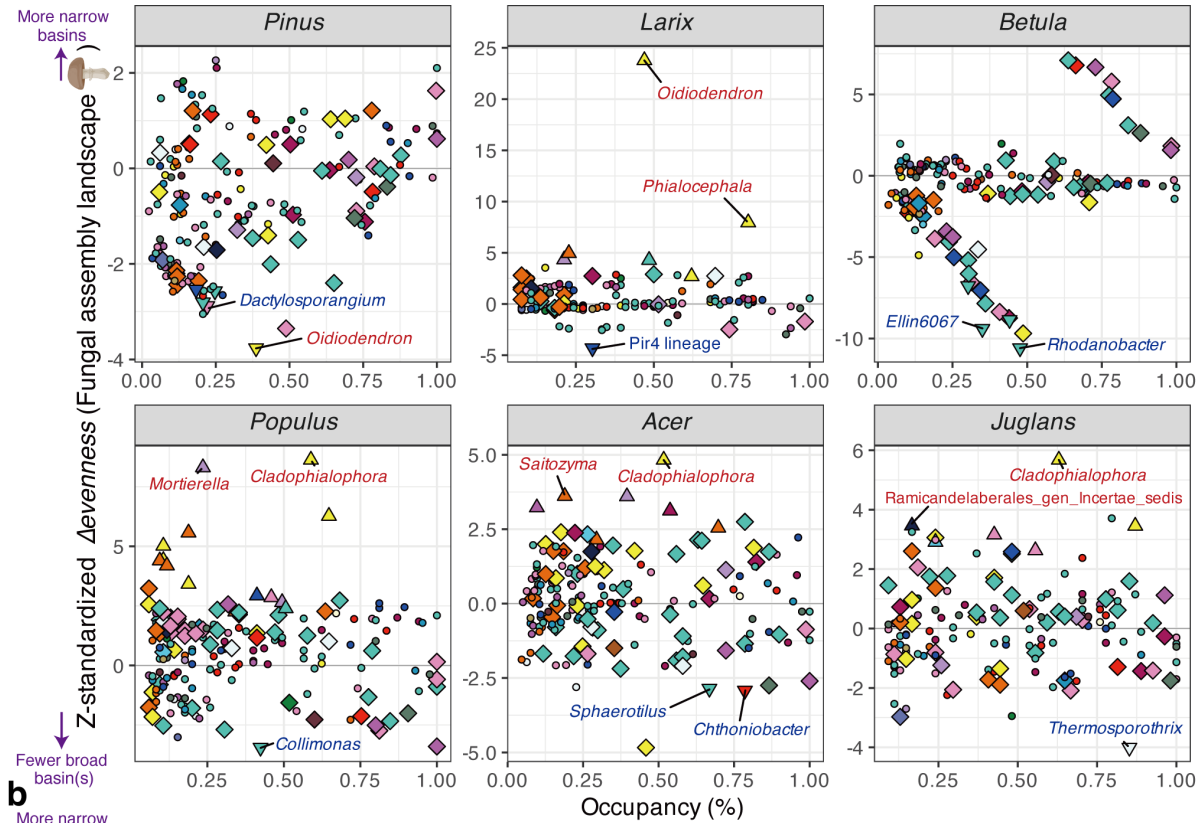

**b**

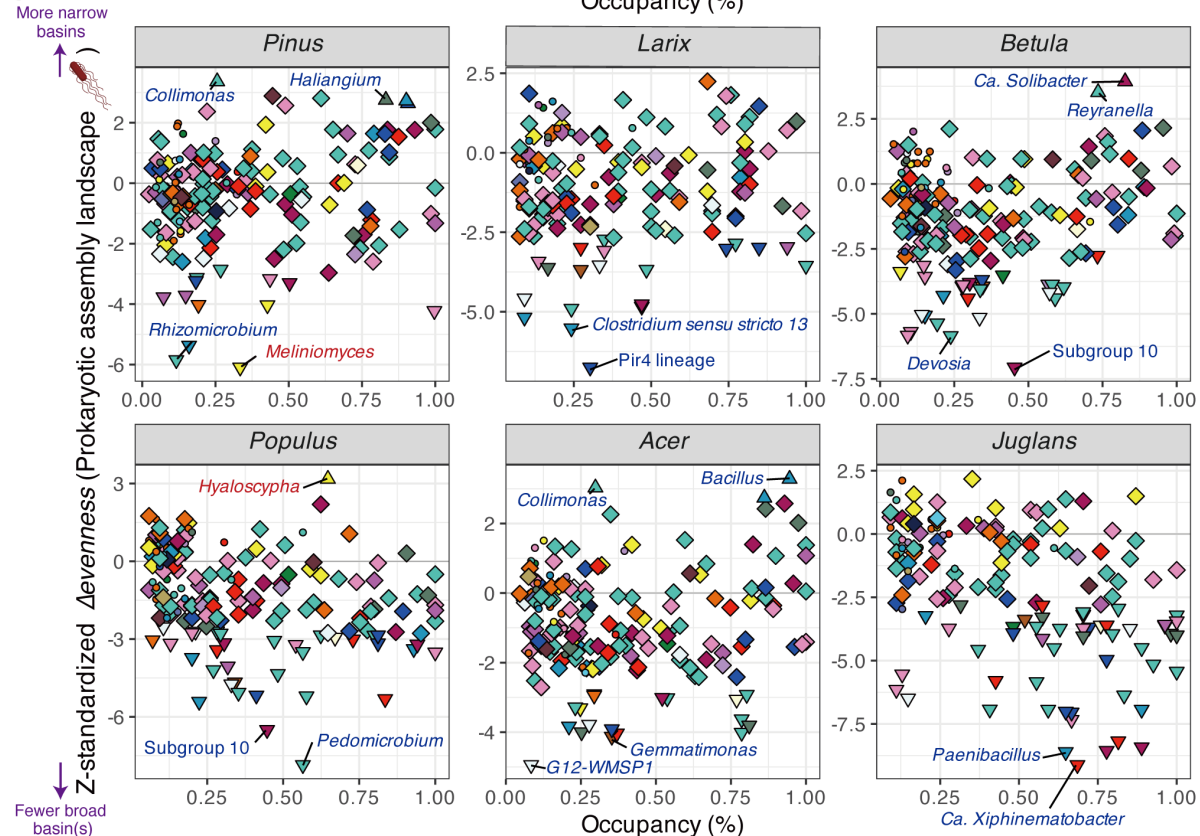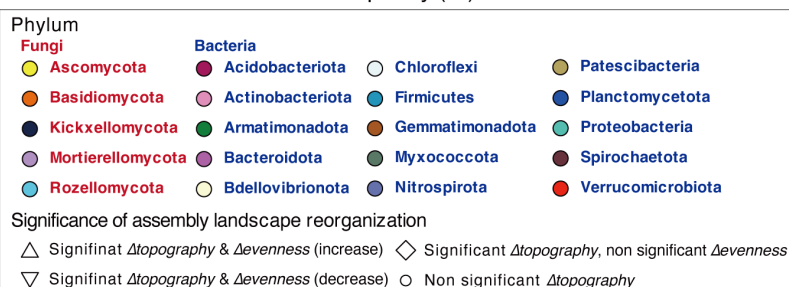

266 **Supplementary Fig. S15 | Potential impacts on the evenness of the basin distributions and the**  
267 **occupancy of each microbial genus. (a)** Z-standardized *Δevenness* of individual microbial genera in  
268 fungal energy landscapes. Genera whose abundance changes are inferred to substantially alter the  
269 basin distributions and frequencies within the energy landscape are highlighted in each host plant  
270 background. **(b)** Z-standardized *Δevenness* of individual microbial genera in prokaryotic energy  
271 landscapes.  
272

## Fungal assembly landscape

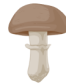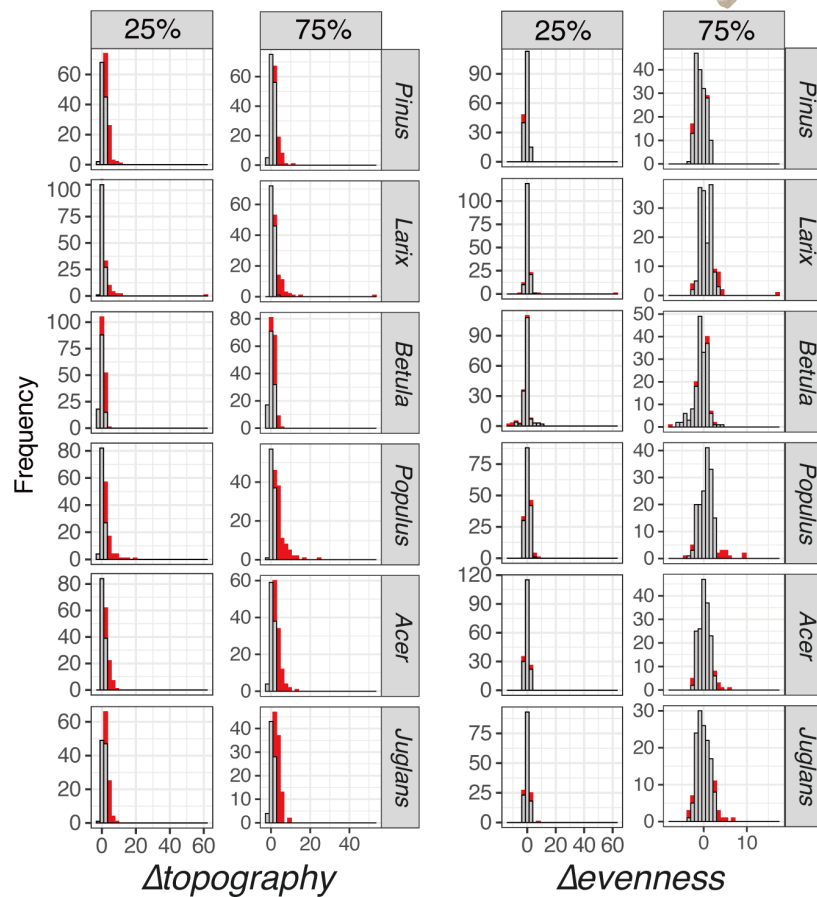

## Prokaryotic assembly landscape

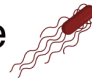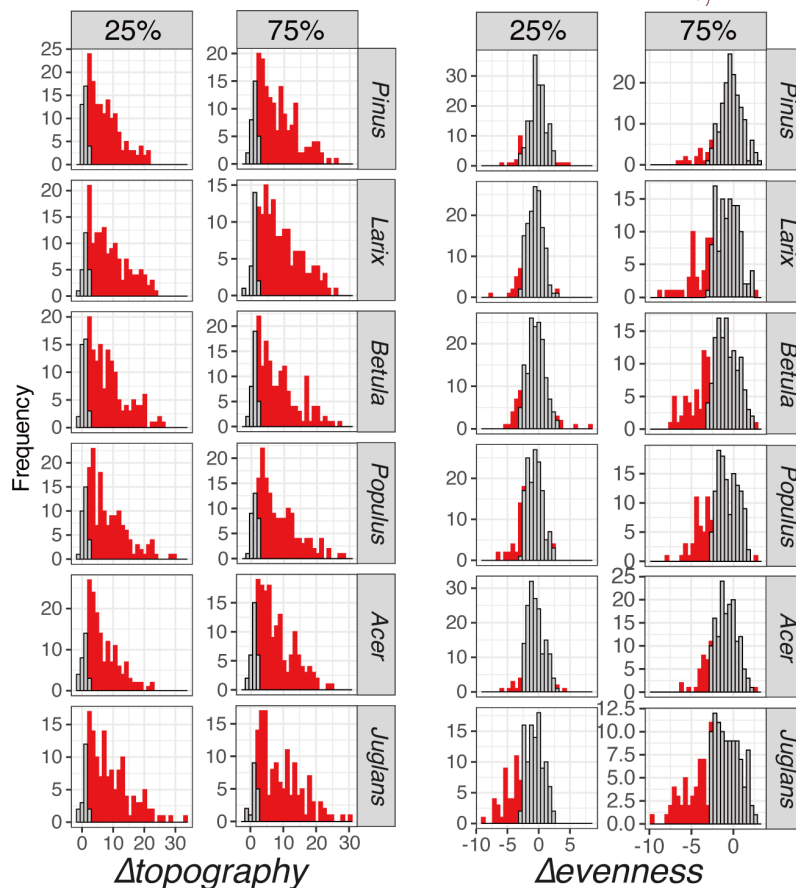

**Significance**  
 ■  $P(\text{FDR}) < 0.05$   
 ■ Non significant  
 $\Delta\text{topography}$  : one-tailed test  
 $\Delta\text{evenness}$  : two-tailed test

274 **Supplementary Fig. S16 | Histograms of “keystoneness” metrics based on 25% and 75%**  
275 **quantiles of the relative abundances of each microbial genus.** The z-standardized  $\Delta topography$  and  
276  $\Delta evenness$  metrics respectively represent changes in the overall topography and evenness of basin  
277 distributions in fungal and prokaryotic energy landscape architecture along the two abundance  
278 gradients of a focal genus (see Fig. 1d-g). Results are shown separately for each host-plant  
279 background.  
280

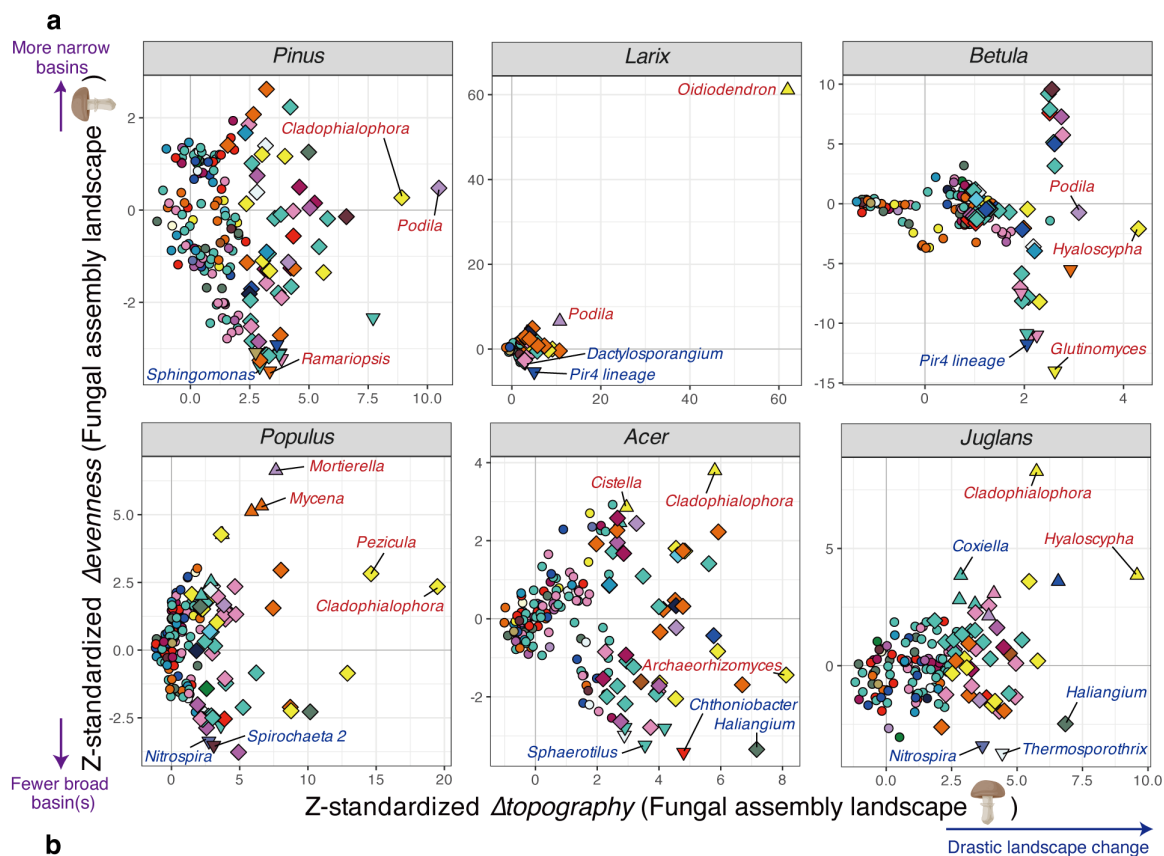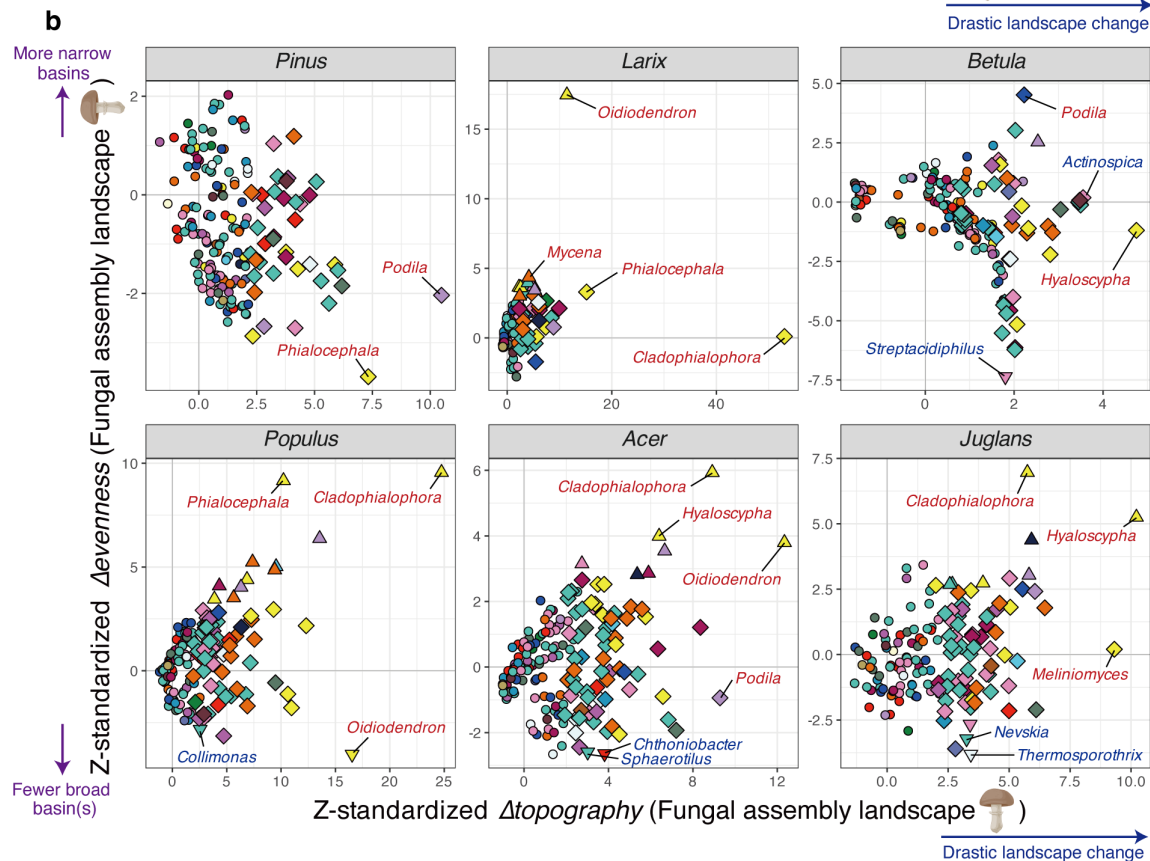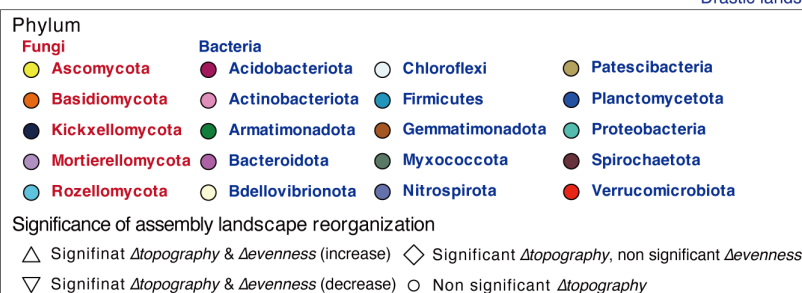

282 **Supplementary Fig. S17 | Potential impacts on the fungal community assembly along the two**  
283 **representative abundance gradients of each microbial genus. (a)** Taxa strongly associated with the  
284 energy landscape reorganizations along their abundance gradients from 0% (absence) to 25% quantile.  
285 On two-dimensional planes defined by  $\Delta topography$  and  $\Delta evenness$ , microbial genera whose  
286 abundance changes were inferred to substantially reshape the energy landscape architecture of root-  
287 associated fungal communities are highlighted. **(b)** Taxa strongly associated with the energy landscape  
288 reorganizations along their abundance gradients from 0% (absence) to 75% quantile.

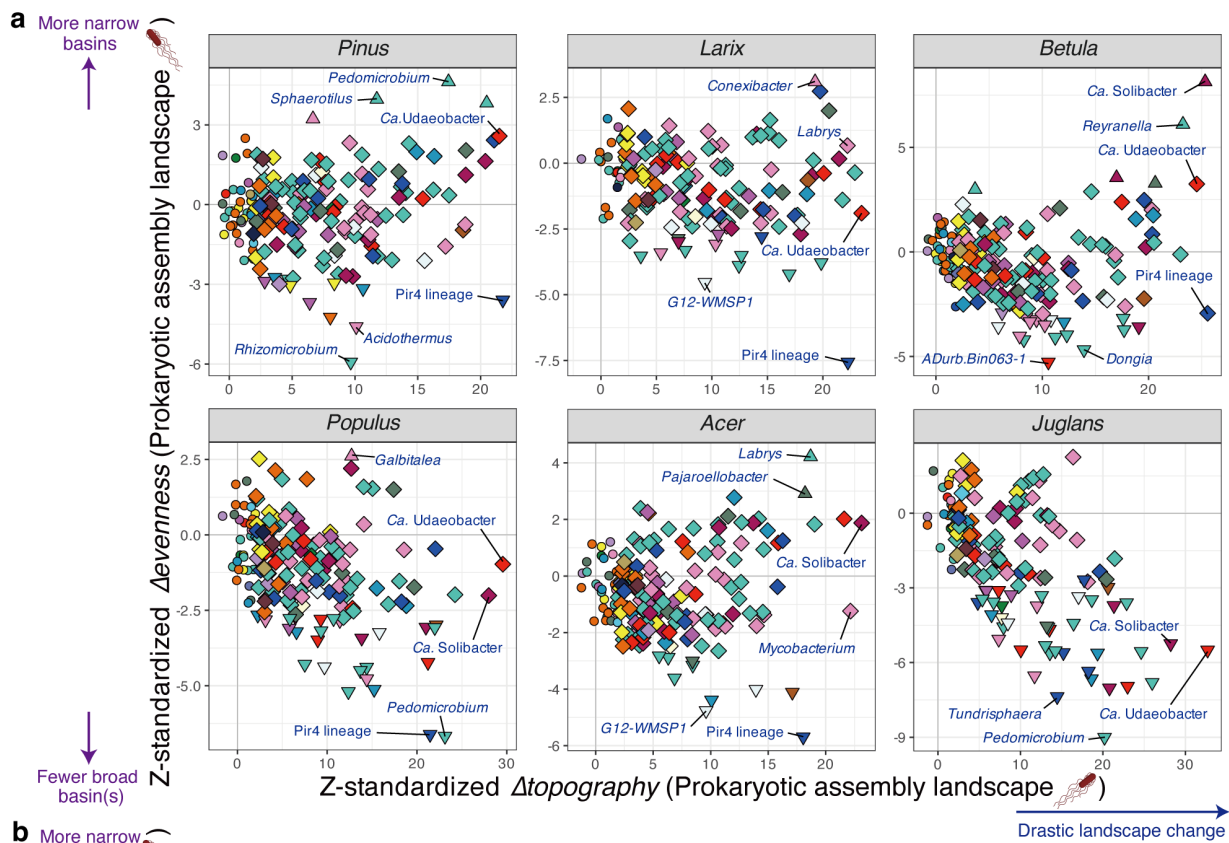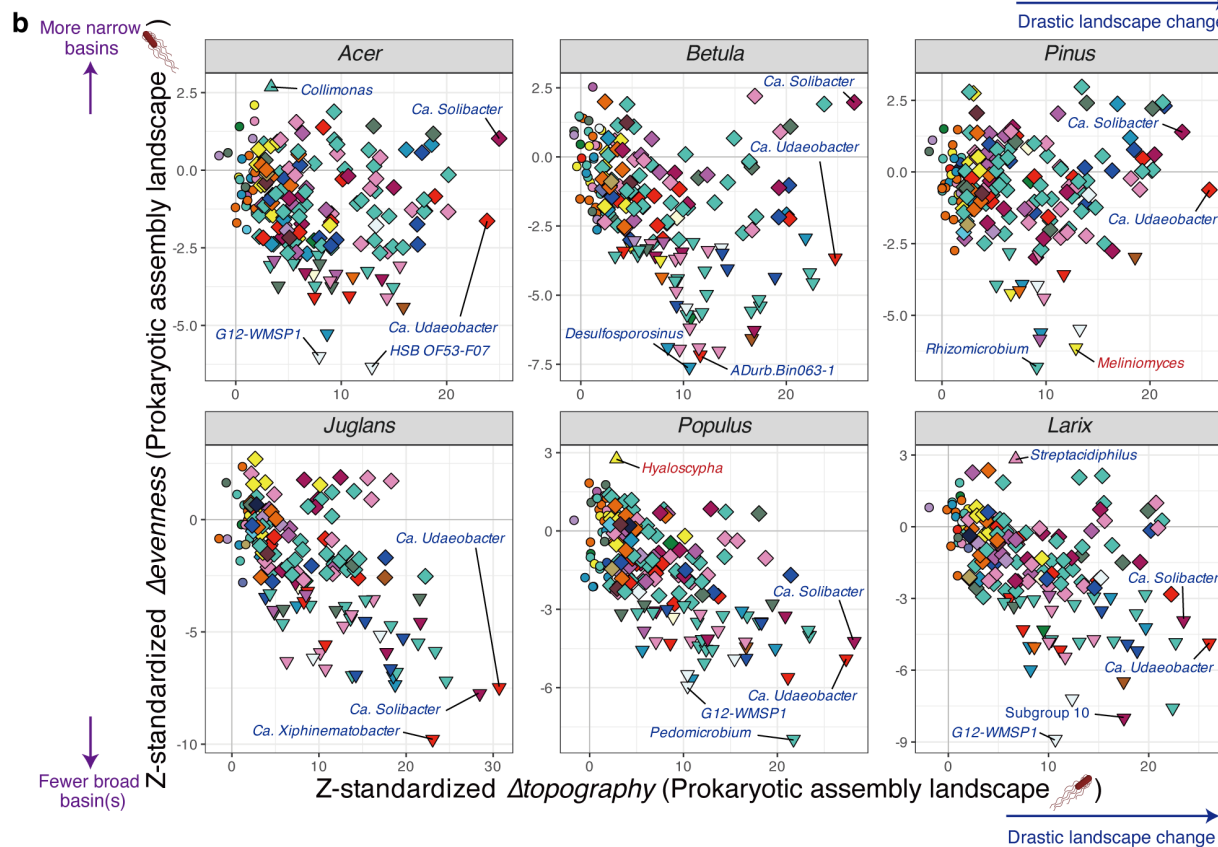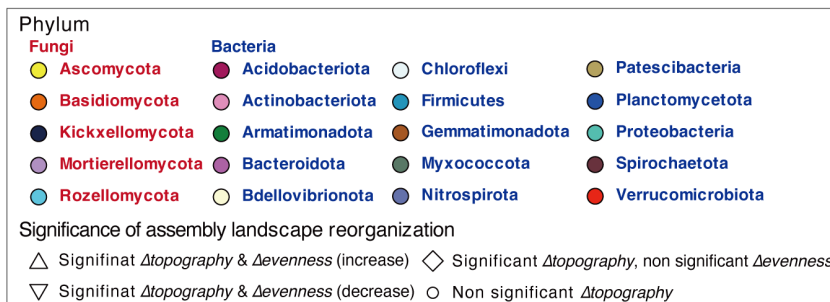

290 **Supplementary Fig. S18 | Potential impacts on the prokaryotic community assembly along the**  
291 **two representative abundance gradients of each microbial genus. (a)** Taxa strongly associated  
292 with the energy landscape reorganizations along their abundance gradients from 0% (absence) to 25%  
293 quantile. On two-dimensional planes defined by  $\Delta topography$  and  $\Delta evenness$ , microbial genera whose  
294 abundance changes were inferred to substantially reshape the energy landscape architecture of root-  
295 associated prokaryotic communities are highlighted. **(b)** Taxa strongly associated with the energy  
296 landscape reorganizations along their abundance gradients from 0% (absence) to 75% quantile.

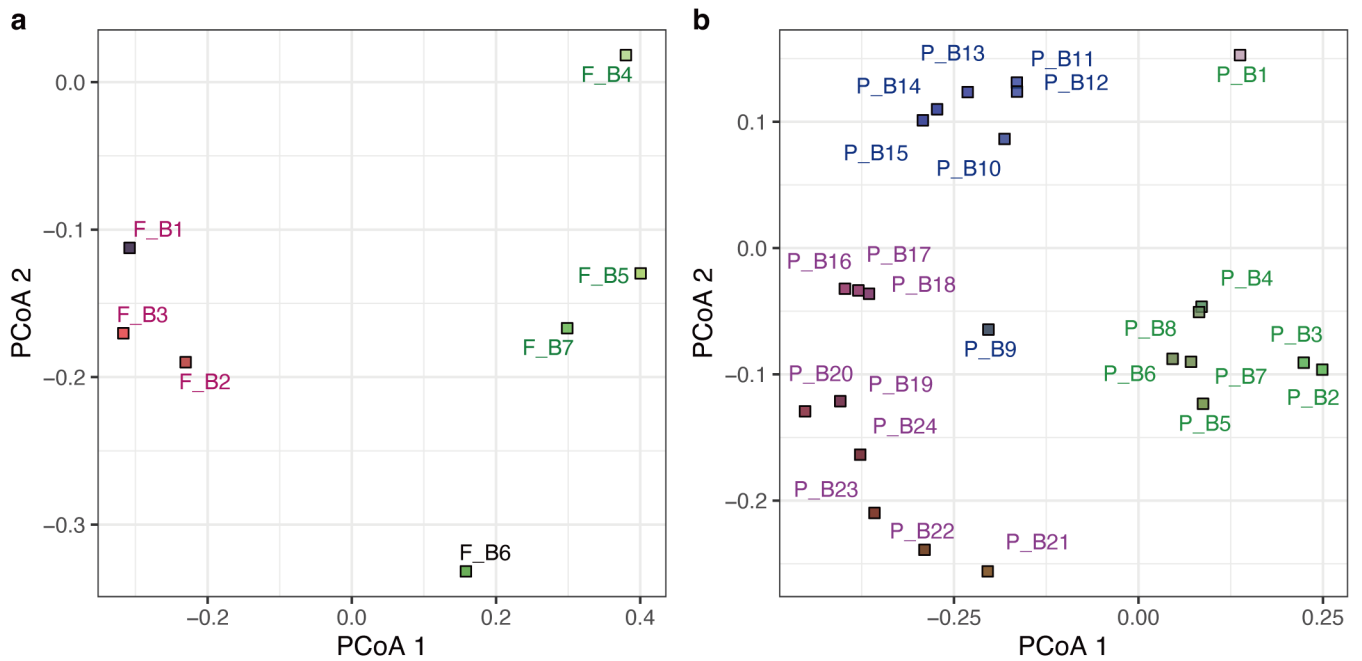

**Supplementary Fig. S19 | Community structures of the basin bottoms. (a)** Principal coordinate analysis (PCoA) of the fungal basin bottoms shown in Figure 2c. Dissimilarities among the bottom states are calculated based on Jaccard distance. The colors correspond to those in Figure 2c and Supplementary Figure S20. **(b)** PCoA of the prokaryotic basin bottoms shown in Figure 3c. The colors correspond to those in Figure 3c and Supplementary Figure S23.

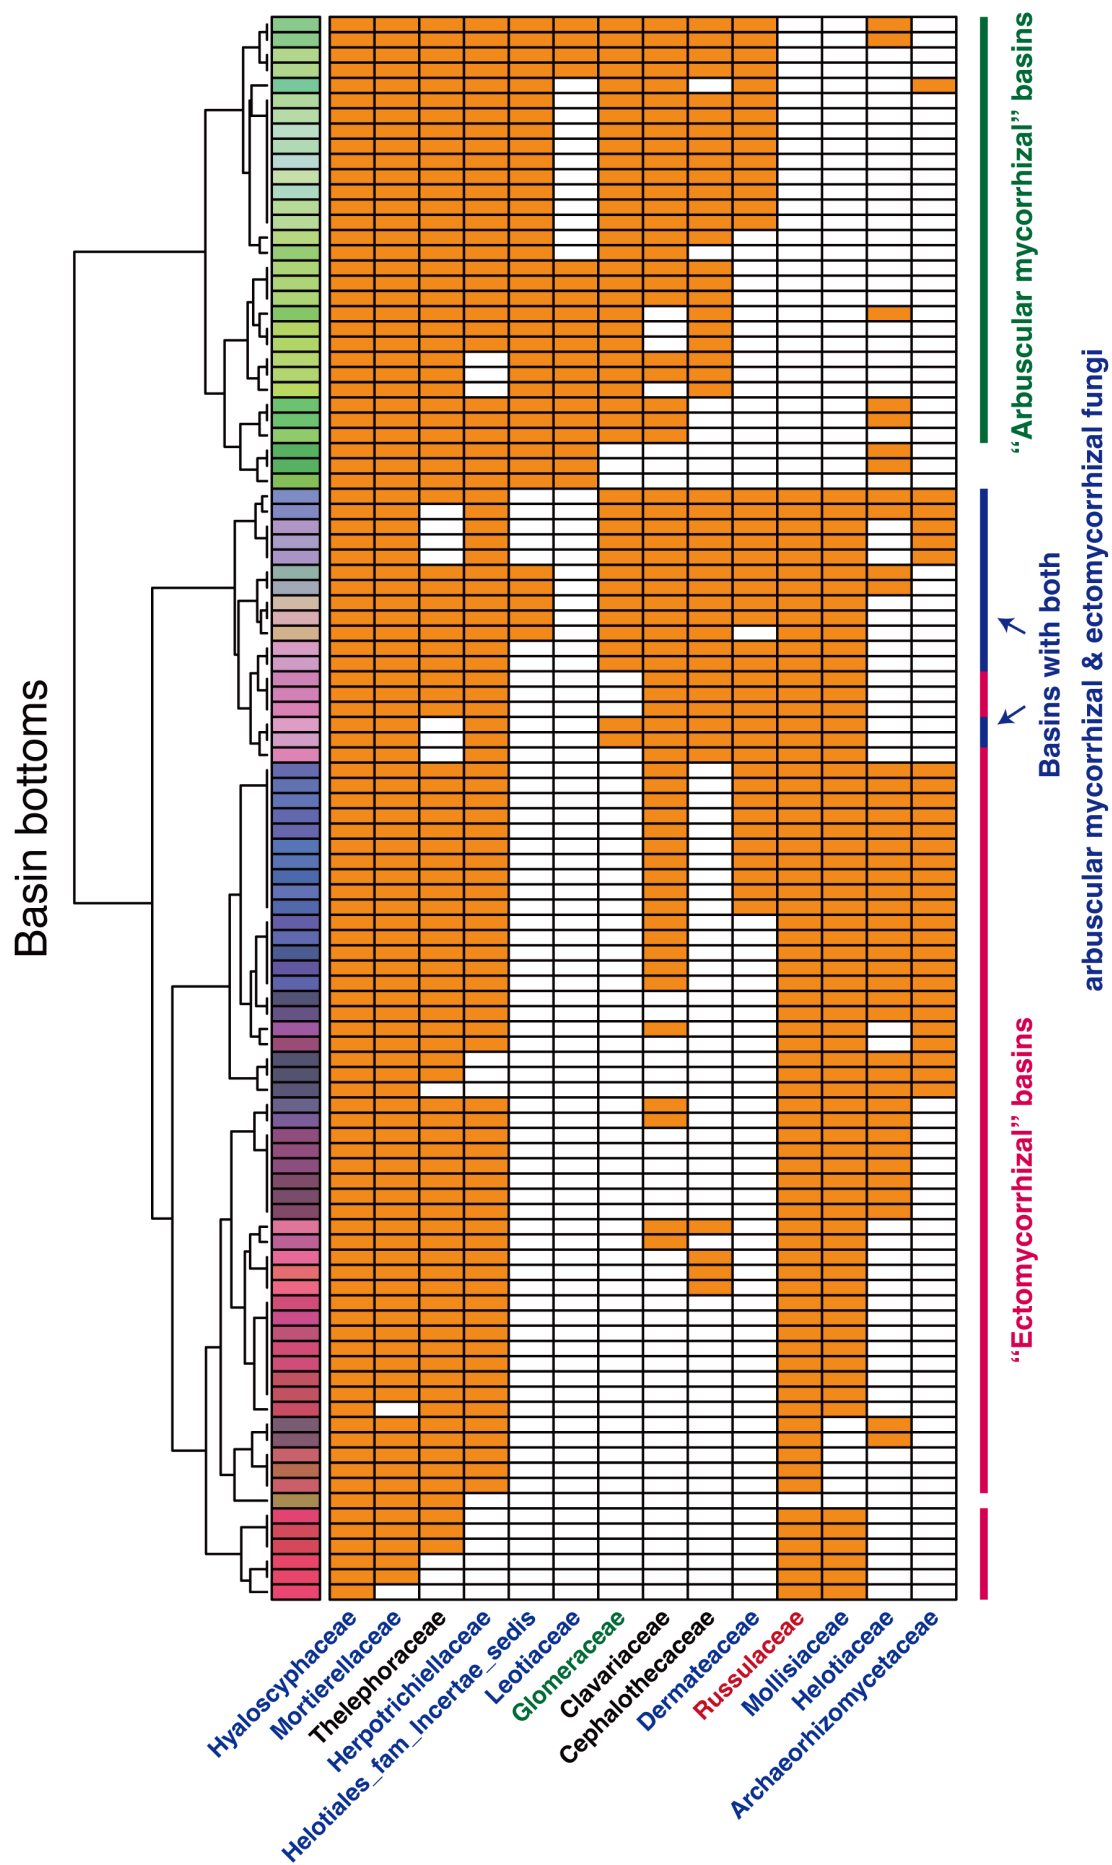

Supplementary Fig. S20 | Community states at basin bottoms of fungal energy landscapes. The

basin bottoms inferred across the six host-plant backgrounds in Figures 2c and 5 as well as in Supplementary Figures S21 and S22 are shown with a dendrogram representing taxonomic membership similarity. The color gradient of left-side panel represents the degree of similarity/dissimilarity among community states, corresponding to those illustrated in the flow diagrams (see Fig. 5 and Supplementary Figs. S21 and S22). Depending on the presence/absence of Glomeraceae and Russulaceae, "arbuscular mycorrhizal" and "ectomycorrhizal" basins are tentatively defined. In addition to the basins in Figures 2c, some basins including both Glomeraceae and Russulaceae were detected. Fungal families are colored according to functional guilds: green, arbuscular mycorrhizal; red, ectomycorrhizal; blue, potentially endophytic; black, families with multiple or other functions.

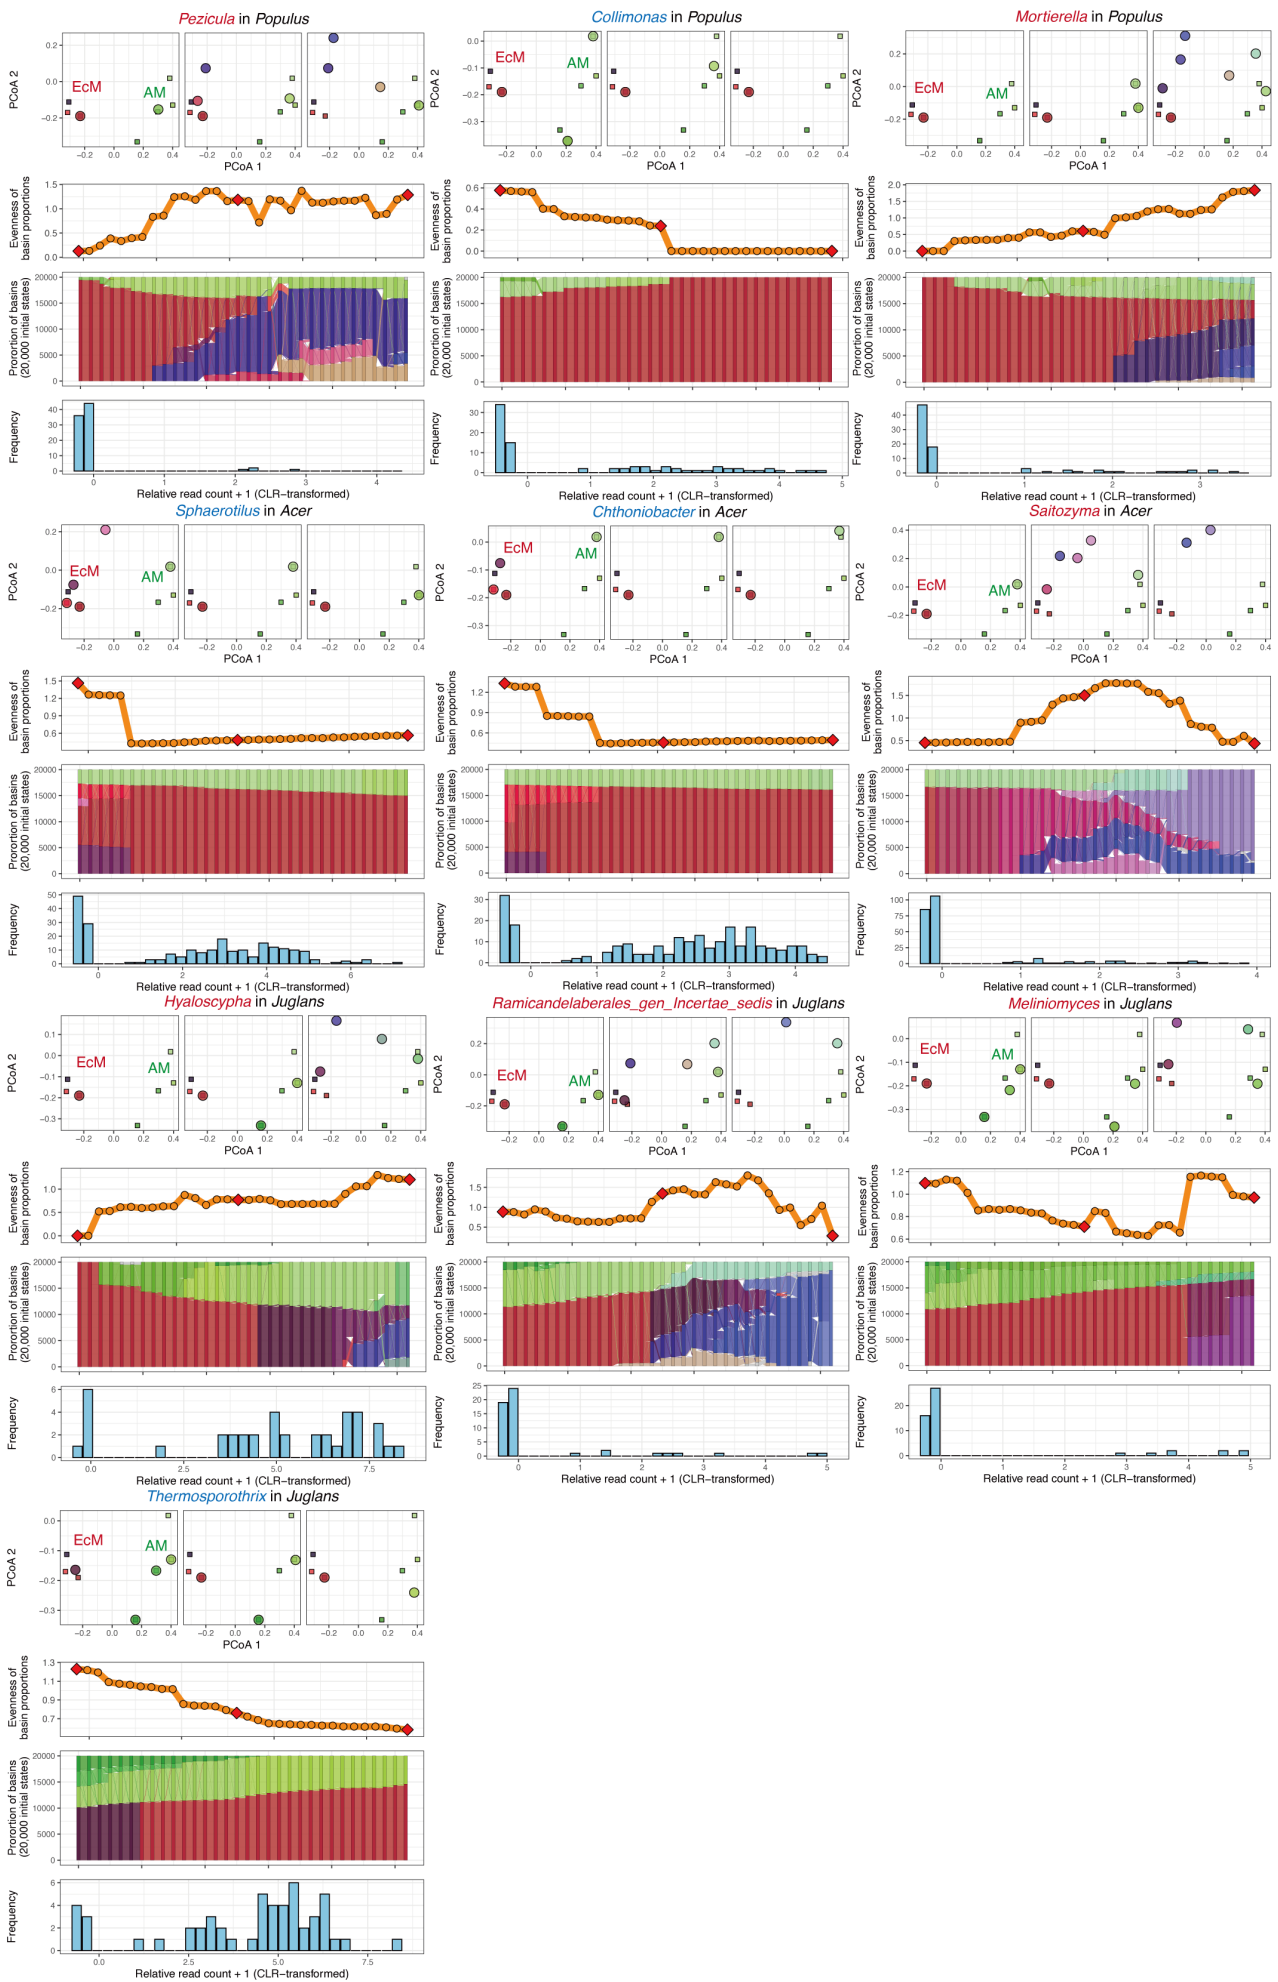

**Supplementary Fig. S21 | Fungal energy landscape reorganization in the dual mycorrhizal host-plant backgrounds.** Along the abundance gradient of each microbial genus highlighted in Figure 4b (*Populus*, *Acer* and *Juglans*), changes in the frequency distribution of fungal energy landscape basins are shown. Frequencies are evaluated through 20,000 simulations of community assemblies from randomly generated initial states, under 32 abundance conditions ranging from absence to the maximum observed abundance in the host. On the PCoA planes, the basin bottoms detected at three representative abundance levels within 32 equally spaced relative abundance steps—absence (step 1), intermediate abundance (step 16), and maximum abundance (step 32)—are shown as circles, together with the states detected in Figure 2c (see Supplementary Fig. S19a). The Shannon entropy of the basin frequencies is also shown along the abundance axis (CLR-transformed relative read counts of a focal genus). In addition, the destinations of the initial communities in each condition of the focal genus's abundance are indicated in the flow diagrams with the histograms of their relative abundances in the hosts. Each bar plot depicts the frequency of basin bottoms detected under the corresponding abundance condition. The bottoms which the same initial community state converged across adjacent abundance conditions (steps) are connected with bands. Colors represent community compositional similarity based on Jaccard distance, with more similar compositions rendered in more similar colors (see Fig. 2c; Supplementary Fig. S20).

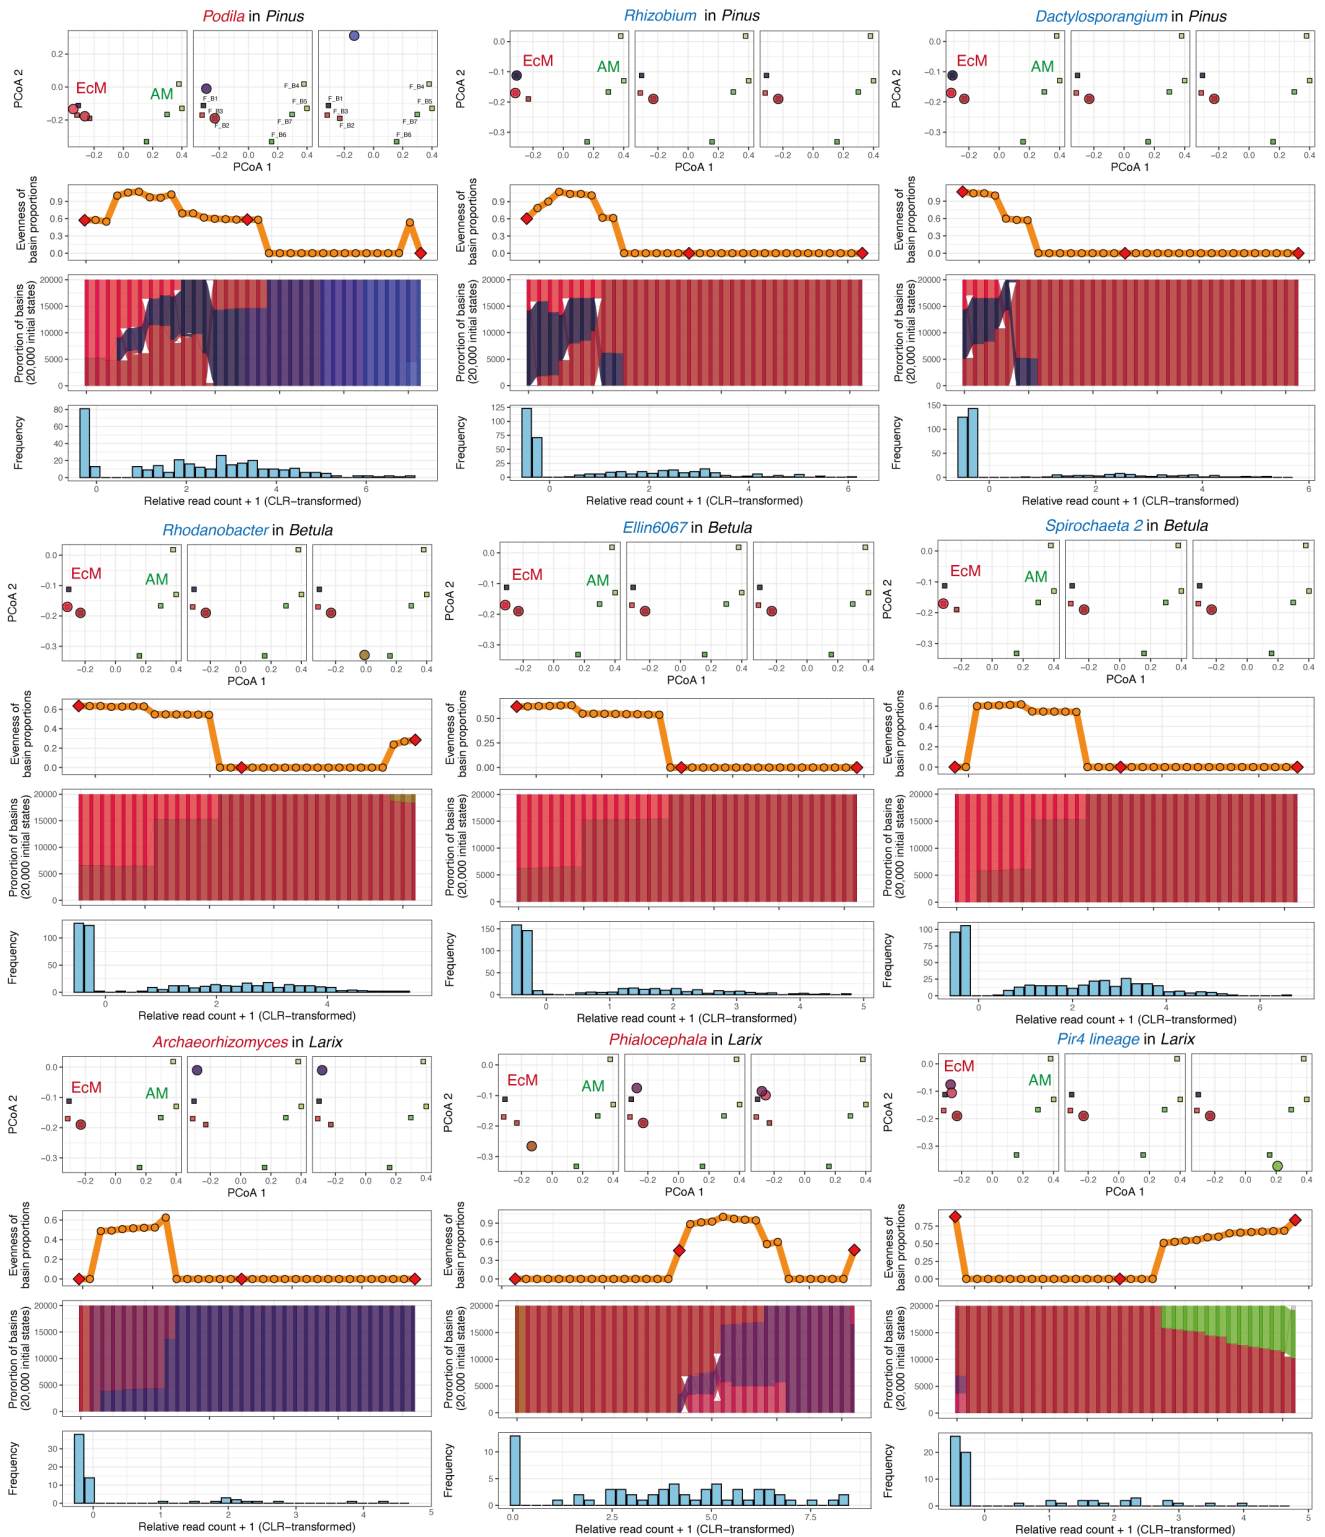

**Supplementary Fig. S22 | Fungal energy landscape reorganization in the ectomycorrhizal host-plant backgrounds.** Along the abundance gradient of each microbial genus highlighted in figure 4b (*Pinus*, *Betula* and *Larix*), changes in the frequency distribution of fungal energy landscape basins are shown. Frequencies are evaluated through 20,000 simulations of community assemblies from randomly generated initial states, under 32 abundance conditions ranging from absence to the maximum observed abundance in the host. On the PCoA planes, the basin bottoms detected at three representative abundance levels within 32 equally spaced relative abundance steps—absence (step 1),

intermediate abundance (step 16), and maximum abundance (step 32)—are shown as circles, together with the states detected in Figure 2c (see Supplementary Fig. S19a). The Shannon entropy of the basin frequencies is also shown along the abundance axis (CLR-transformed relative read counts of a focal genus). In addition, the destinations of the initial communities in each condition of the focal genus's abundance are indicated in the flow diagrams with the histograms of their relative abundances in the hosts. Each bar plot depicts the frequency of basin bottoms detected under the corresponding abundance condition. The bottoms which the same initial community state converged across adjacent abundance conditions (steps) are connected with bands. Colors represent community compositional similarity based on Jaccard distance, with more similar compositions rendered in more similar colors (see Fig. 2c; Supplementary Fig. S20).

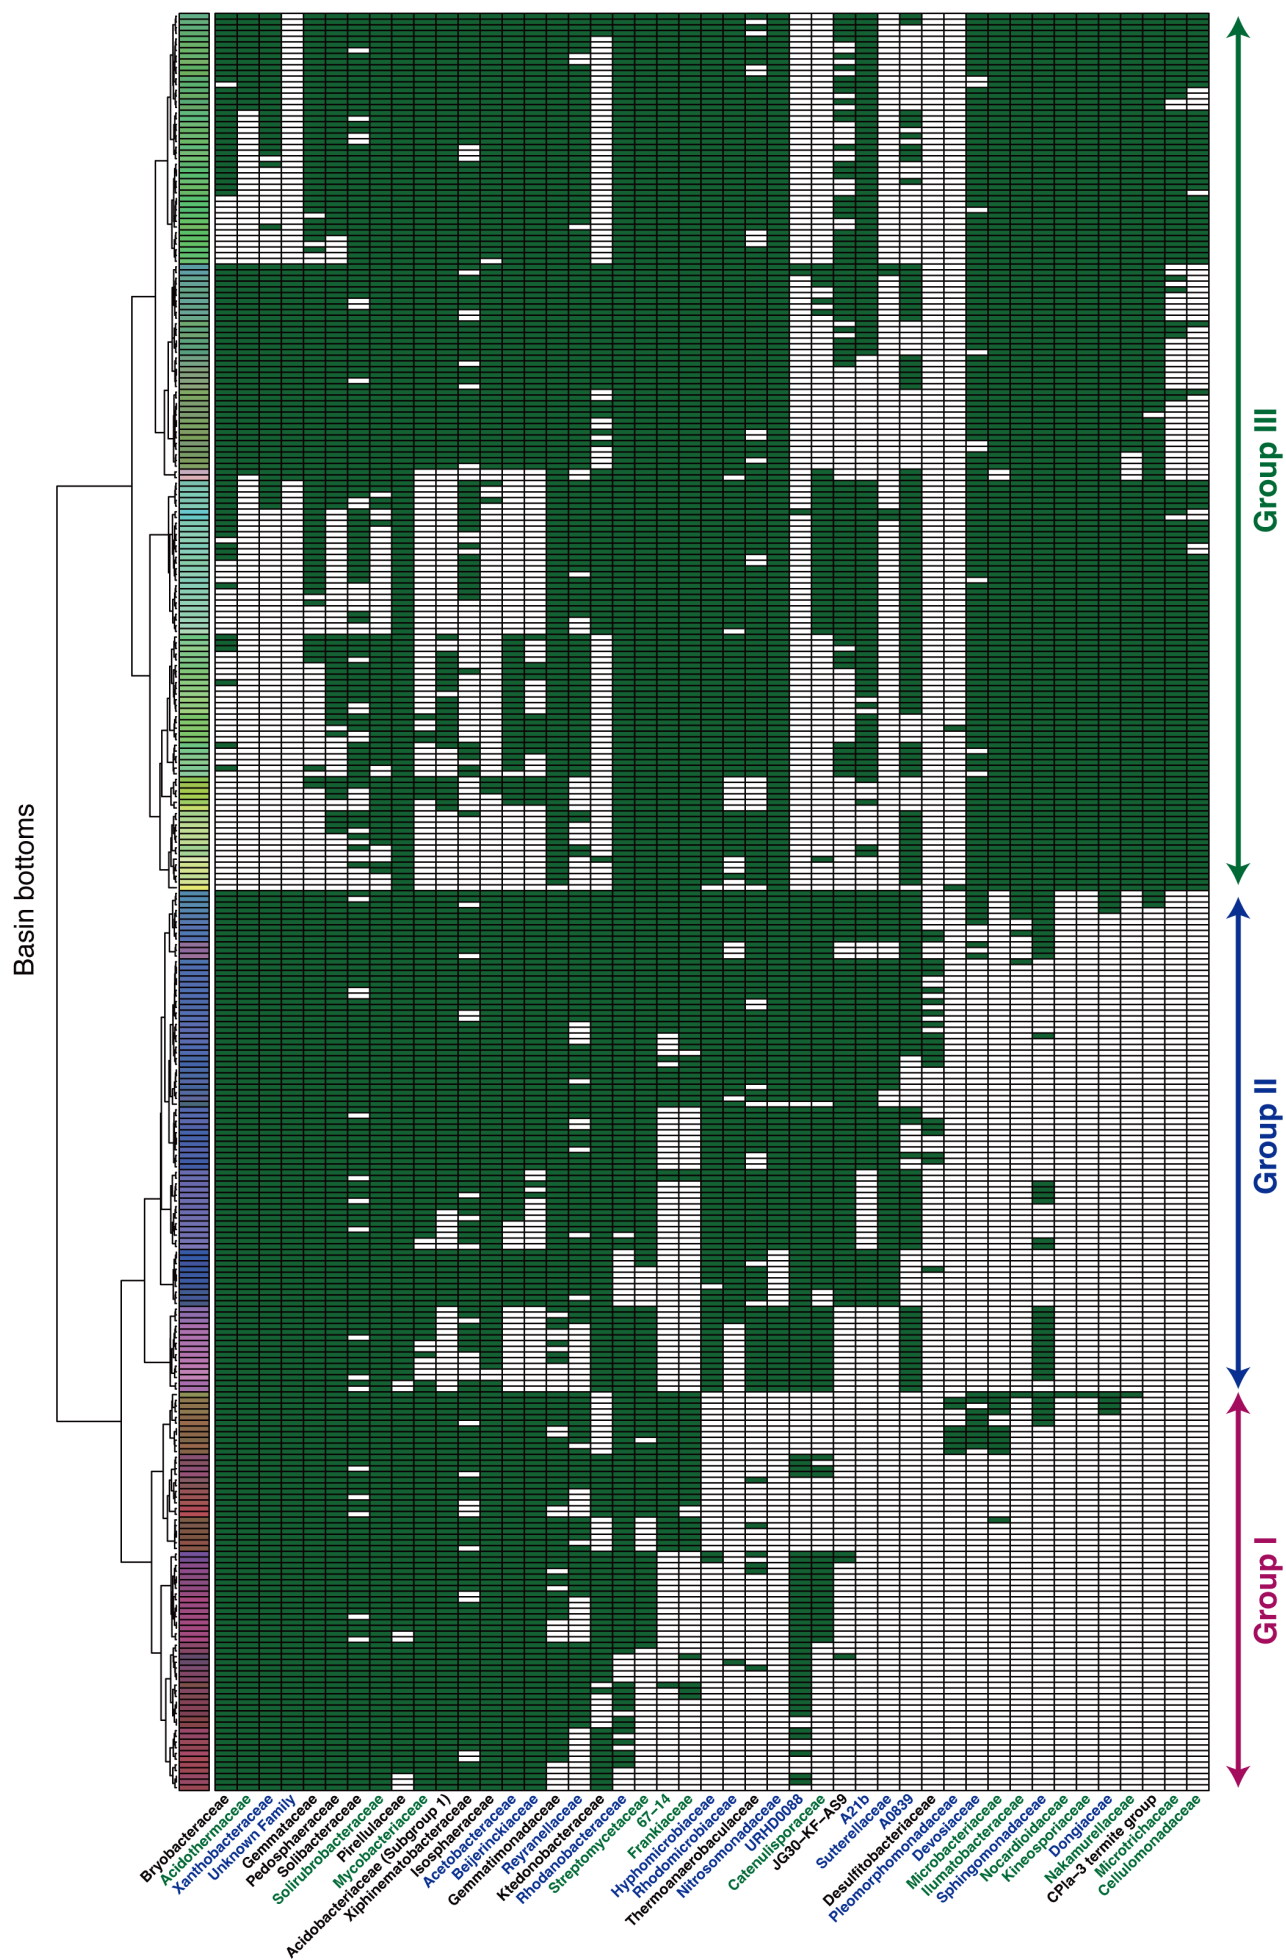

**Supplementary Fig. S23 | Community states at basin bottoms of prokaryotic energy landscapes.**  
The basin bottoms inferred across the six host plant backgrounds in Figures 3c and 6, Supplementary Figures S24 and S25 are shown with a dendrogram representing taxonomic membership similarity. The color gradient of left-side panel represents the degree of similarity/dissimilarity among community states, corresponding to those illustrated in the flow diagrams (see Fig. 6 and Supplementary Figs. S24 and S25). The basins are tentatively classified into three categories: Group I, consisting primarily of commonly observed families; Group II, characterized by the presence of additional Pseudomonadota families; and Group III, characterized by the presence of additional Actinomycetota families. Prokaryotic families are colored according to their phylum-level taxonomy: blue, Pseudomonadota; green, Actinomycetota; black, other phyla.

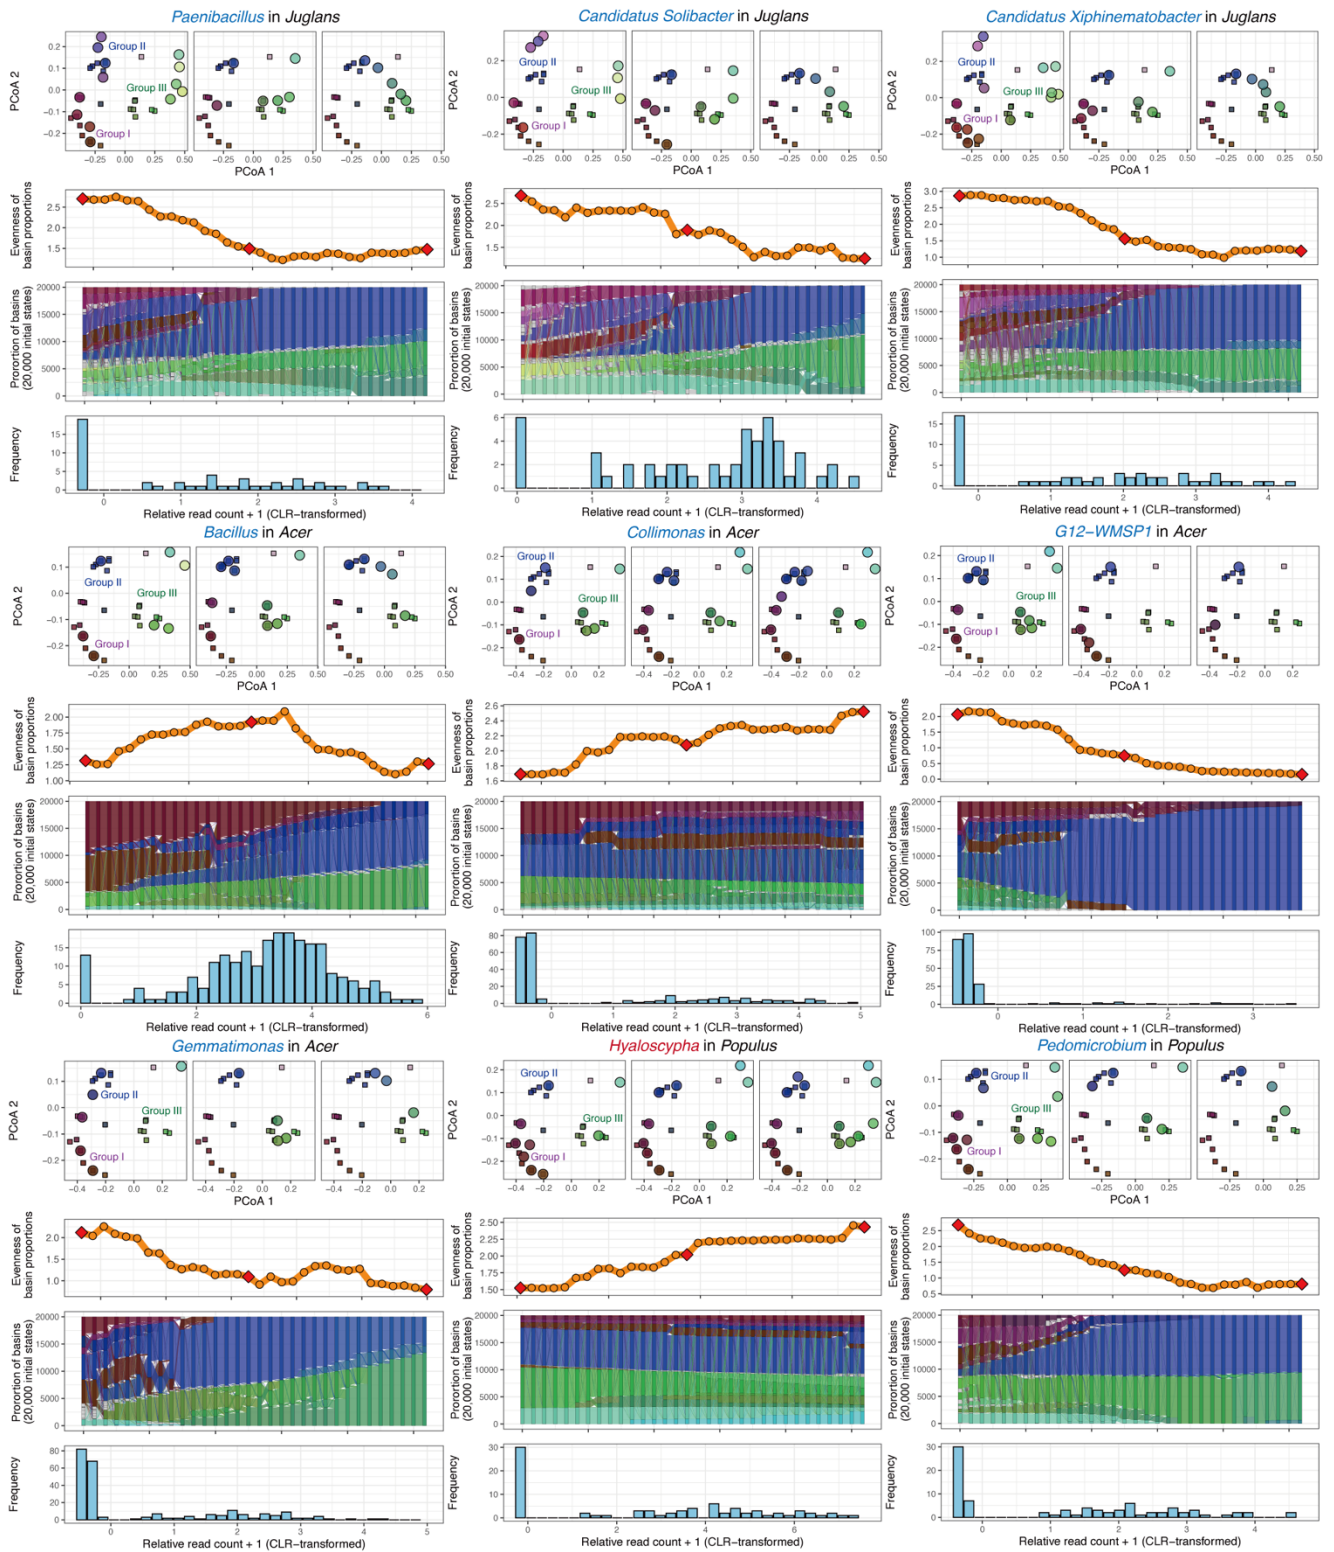

**Supplementary Fig. S24 | Prokaryotic energy landscape reorganization in the dual mycorrhizal host-plant backgrounds.** Along the abundance gradient of each microbial genus highlighted in Figure 4d (*Juglans*, *Acer* and *Populus*), changes in the frequency distribution of prokaryotic energy landscape basins are shown. Frequencies are evaluated through 20,000 simulations of community assemblies from randomly generated initial states, under 32 abundance conditions ranging from absence to the maximum observed abundance in the host. On the PCoA planes, the basin bottoms detected at three representative abundance levels within 32 equally spaced relative abundance steps—

372 absence (step 1), intermediate abundance (step 16), and maximum abundance (step 32)—are shown as  
373 circles, together with the states detected in Figure 3c (see Supplementary Fig. S19b). The Shannon  
374 entropy of the basin frequencies is also shown along the abundance axis (CLR-transformed relative  
375 read counts of a focal genus). In addition, the destinations of the initial communities in each condition  
376 of the focal genus's abundance are indicated in the flow diagrams with the histograms of their relative  
377 abundances in the hosts. Each bar plot depicts the frequency of basin bottoms detected under the  
378 corresponding abundance condition. The bottoms which the same initial community state converged  
379 across adjacent abundance conditions (steps) are connected with bands. Colors represent community  
380 compositional similarity based on Jaccard distance, with more similar compositions rendered in more  
381 similar colors (see Fig. 3c; Supplementary Fig. S23).

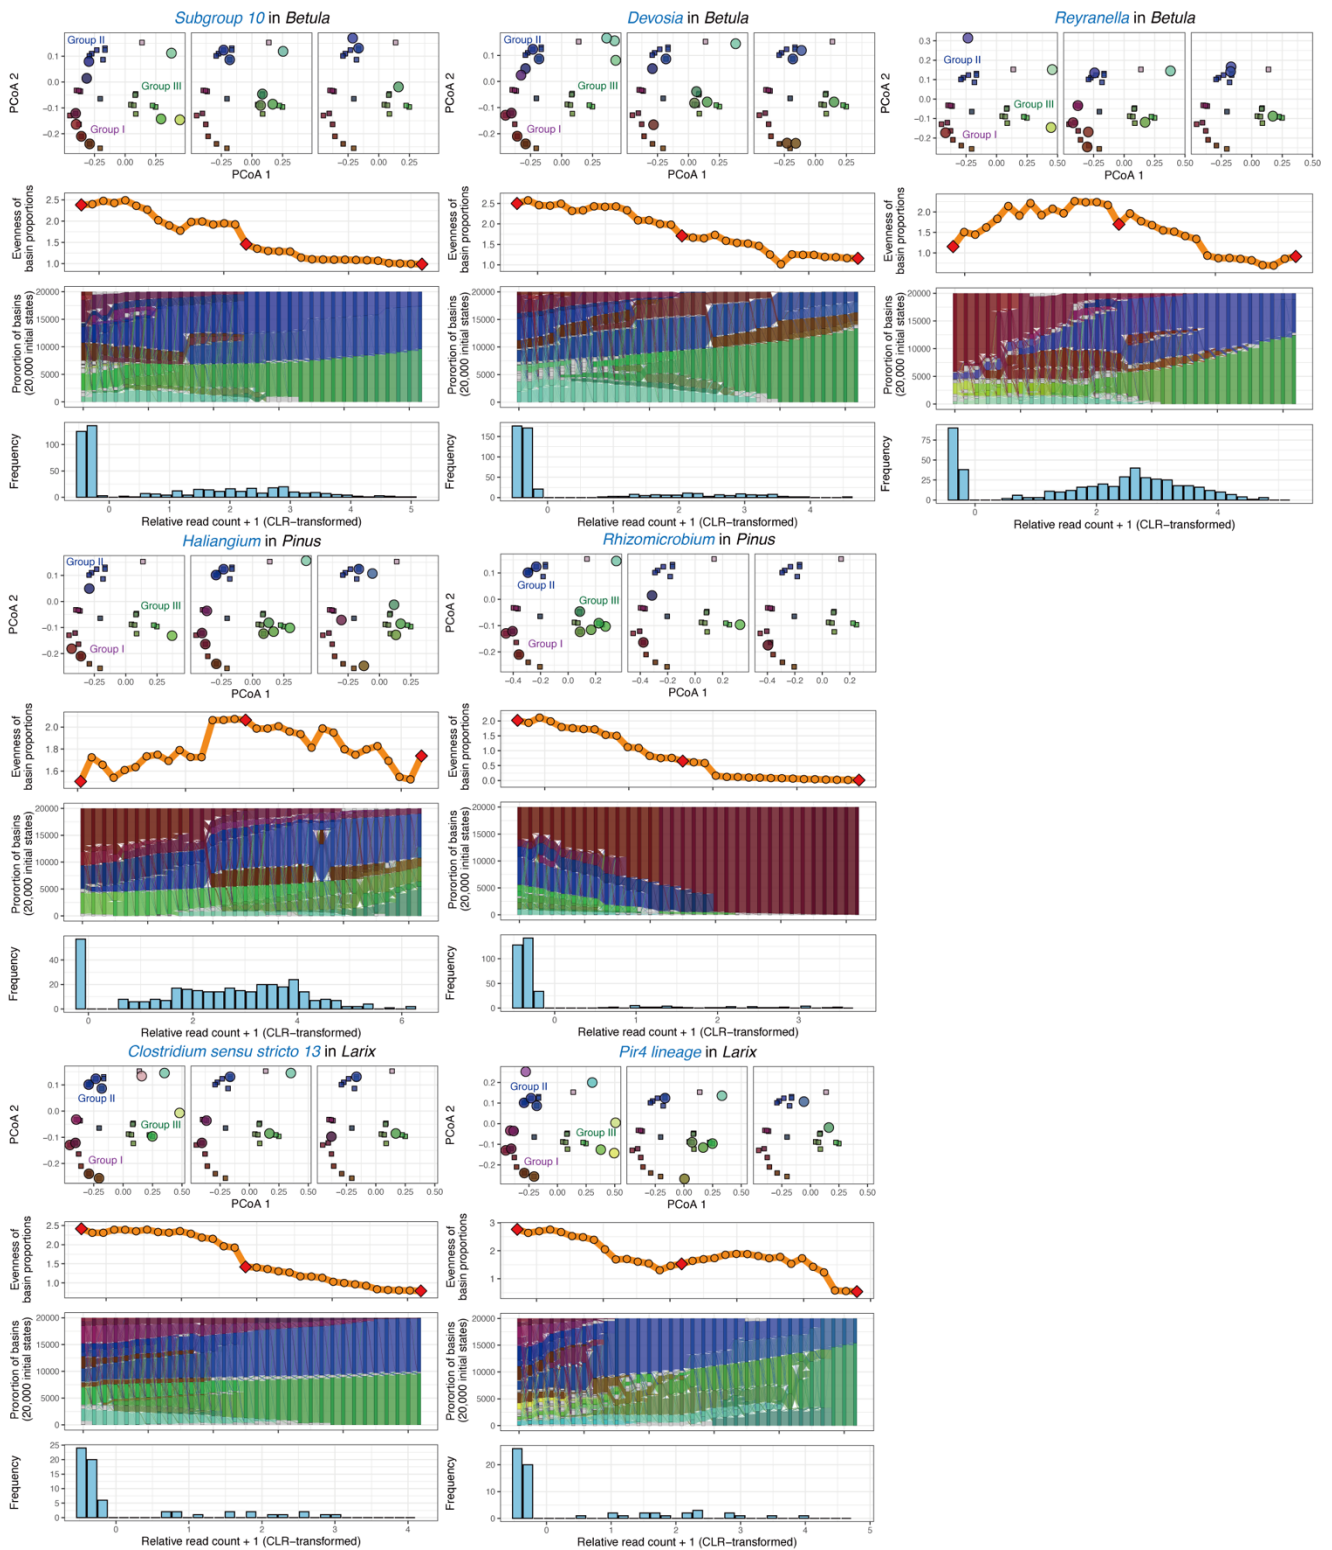

382

383

384

385

386

387

388

**Supplementary Fig. S25 | Prokaryotic energy landscape reorganization in the ectomycorrhizal host-plant backgrounds.** Along the abundance gradient of each microbial genus highlighted in Figure 4d (*Betula*, *Pinus*, and *Larix*), changes in the frequency distribution of prokaryotic energy landscape basins are shown. Frequencies are evaluated through 20,000 simulations of community assemblies from randomly generated initial states, under 32 abundance conditions ranging from absence to the maximum observed abundance in the host. On the PCoA planes, the basin bottoms

389 detected at three representative abundance levels within 32 equally spaced relative abundance steps—  
390 absence (step 1), intermediate abundance (step 16), and maximum abundance (step 32)—are shown as  
391 circles, together with the states detected in Figure 3c (see Supplementary Fig. S19b). The Shannon  
392 entropy of the basin frequencies is also shown along the abundance axis (CLR-transformed relative  
393 read counts of a focal genus). In addition, the destinations of the initial communities in each condition  
394 of the focal genus's abundance are indicated in the flow diagrams with the histograms of their relative  
395 abundances in the hosts. Each bar plot depicts the frequency of basin bottoms detected under the  
396 corresponding abundance condition. The bottoms which the same initial community state converged  
397 across adjacent abundance conditions (steps) are connected with bands. Colors represent community  
398 compositional similarity based on Jaccard distance, with more similar compositions rendered in more  
399 similar colors (see Fig. 3c; Supplementary Fig. S23).

400 **Supplementary Table S1 | Prioritization of fungal families based on their contributions to**  
401 **overall community structure.** To select candidate family sets for subsequent analyses (see  
402 Supplementary Figs. S1 and S3), individual fungal families were prioritized according to their  
403 explanatory power for the abundance-based fungal community structure. Specifically, a PerMANOVA  
404 was performed on the relative abundance matrix of fungal data using the presence/absence of each  
405 family as an explanatory variable (10,000 iterations). In the PerMANOVA, Bray-Curtis distance was  
406 used to quantify community dissimilarity between root samples, and the host plant backgrounds and  
407 sampling points were included as additional explanatory variables (i.e., covariates).

| Family                           | $R^2$                 | $P$ (FDR) |
|----------------------------------|-----------------------|-----------|
| Russulaceae                      | $3.76 \times 10^{-2}$ | < 0.001   |
| Thelephoraceae                   | $1.50 \times 10^{-2}$ | < 0.001   |
| Hydnaceae                        | $1.30 \times 10^{-2}$ | < 0.001   |
| Tricholomataceae                 | $1.26 \times 10^{-2}$ | < 0.001   |
| Hyaloscyphaceae                  | $1.12 \times 10^{-2}$ | < 0.001   |
| Glomeraceae                      | $1.11 \times 10^{-2}$ | < 0.001   |
| Mollisiaceae                     | $1.08 \times 10^{-2}$ | < 0.001   |
| Mycenaceae                       | $9.92 \times 10^{-3}$ | < 0.001   |
| Herpotrichiellaceae              | $8.50 \times 10^{-3}$ | < 0.001   |
| Clavariaceae                     | $6.55 \times 10^{-3}$ | < 0.001   |
| Dermateaceae                     | $5.53 \times 10^{-3}$ | < 0.001   |
| Cephalothecaceae                 | $5.24 \times 10^{-3}$ | < 0.001   |
| Amanitaceae                      | $4.74 \times 10^{-3}$ | < 0.001   |
| Helotiaceae                      | $4.49 \times 10^{-3}$ | < 0.001   |
| Mortierellaceae                  | $4.44 \times 10^{-3}$ | < 0.001   |
| Hymenogastraceae                 | $4.32 \times 10^{-3}$ | < 0.001   |
| Helotiales_fam_Incertae_sedis    | $4.31 \times 10^{-3}$ | < 0.001   |
| Inocybaceae                      | $3.84 \times 10^{-3}$ | < 0.001   |
| Tarzettaceae                     | $3.47 \times 10^{-3}$ | < 0.001   |
| Leotiaceae                       | $3.42 \times 10^{-3}$ | < 0.001   |
| Myxotrichaceae                   | $3.42 \times 10^{-3}$ | < 0.001   |
| Ceratobasidiaceae                | $3.40 \times 10^{-3}$ | < 0.001   |
| Archaeorhizomycetaceae           | $2.76 \times 10^{-3}$ | < 0.001   |
| Cortinariaceae                   | $2.71 \times 10^{-3}$ | < 0.001   |
| Rozellomycota_fam_Incertae_sedis | $2.70 \times 10^{-3}$ | < 0.001   |
| Strophariaceae                   | $2.64 \times 10^{-3}$ | < 0.001   |
| Sebacinaceae                     | $2.61 \times 10^{-3}$ | < 0.001   |
| Aspergillaceae                   | $2.27 \times 10^{-3}$ | < 0.001   |
| Hydnangiaceae                    | $2.25 \times 10^{-3}$ | 0.001     |
| Pyronemataceae                   | $2.24 \times 10^{-3}$ | < 0.001   |

|                                           |                       |         |
|-------------------------------------------|-----------------------|---------|
| Geoglossaceae                             | $2.21 \times 10^{-3}$ | < 0.001 |
| Trimorphomycetaceae                       | $2.20 \times 10^{-3}$ | 0.002   |
| Tylosporaceae                             | $2.20 \times 10^{-3}$ | < 0.001 |
| Tremellodendropsidales_fam_Incertae_sedis | $2.12 \times 10^{-3}$ | < 0.001 |
| Ramicandelaberales_fam_Incertae_sedis     | $2.05 \times 10^{-3}$ | 0.002   |
| Entolomataceae                            | $1.92 \times 10^{-3}$ | 0.001   |
| Leucosporidiales_fam_Incertae_sedis       | $1.91 \times 10^{-3}$ | < 0.001 |
| Pezizaceae                                | $1.85 \times 10^{-3}$ | 0.003   |
| Tuberaceae                                | $1.83 \times 10^{-3}$ | < 0.001 |
| Venturiaceae                              | $1.76 \times 10^{-3}$ | 0.007   |
| Trichosporonaceae                         | $1.72 \times 10^{-3}$ | 0.004   |
| Leptodontidiaceae                         | $1.69 \times 10^{-3}$ | 0.010   |
| Melanommataceae                           | $1.58 \times 10^{-3}$ | 0.008   |
| Psathyrellaceae                           | $1.57 \times 10^{-3}$ | 0.009   |
| Endogonaceae                              | $1.51 \times 10^{-3}$ | 0.006   |
| Cladosporiaceae                           | $1.46 \times 10^{-3}$ | 0.015   |
| Clavicipitaceae                           | $1.43 \times 10^{-3}$ | 0.005   |
| Hypocreaceae                              | $1.43 \times 10^{-3}$ | 0.016   |
| Nectriaceae                               | $1.39 \times 10^{-3}$ | 0.008   |
| Umbelopsidaceae                           | $1.38 \times 10^{-3}$ | 0.014   |
| Microbotryales_fam_Incertae_sedis         | $1.27 \times 10^{-3}$ | 0.017   |
| Cordycipitaceae                           | $1.24 \times 10^{-3}$ | 0.017   |
| Piskurozymaceae                           | $1.23 \times 10^{-3}$ | 0.016   |
| GS11_fam_Incertae_sedis                   | $1.20 \times 10^{-3}$ | 0.013   |
| Pleosporaceae                             | $1.19 \times 10^{-3}$ | 0.042   |
| Mytilinidiaceae                           | $1.06 \times 10^{-3}$ | 0.048   |

---

409 **Supplementary Table S2 | Prioritization of prokaryotic families based on their contributions to**  
410 **overall community structure.** To select candidate family sets for subsequent analyses (see  
411 Supplementary Figs. S1 and S3), individual prokaryotic families were prioritized according to their  
412 explanatory power for the abundance-based prokaryotic community structure. Specifically, a  
413 PerMANOVA was performed on the relative abundance matrix of prokaryotic data, using the  
414 presence/absence of each family as an explanatory variable (10,000 iterations). In the PerMANOVA,  
415 Bray-Curtis distance was used to quantify community dissimilarity between root samples, and the host  
416 plant backgrounds and sampling points were included as additional explanatory variables (i.e.,  
417 covariates).

| Family                 | $R^2$                 | $P$ (FDR) |
|------------------------|-----------------------|-----------|
| Microbacteriaceae      | $2.10 \times 10^{-2}$ | < 0.001   |
| Kineosporiaceae        | $1.97 \times 10^{-2}$ | < 0.001   |
| Dongiaceae             | $1.97 \times 10^{-2}$ | < 0.001   |
| 67-14                  | $1.89 \times 10^{-2}$ | < 0.001   |
| Catenulisporaceae      | $1.79 \times 10^{-2}$ | < 0.001   |
| Ktedonobacteraceae     | $1.75 \times 10^{-2}$ | < 0.001   |
| Nocardiodaceae         | $1.70 \times 10^{-2}$ | < 0.001   |
| Xanthobacteraceae      | $1.56 \times 10^{-2}$ | < 0.001   |
| JG30-KF-AS9            | $1.48 \times 10^{-2}$ | < 0.001   |
| Hyphomicrobiaceae      | $1.42 \times 10^{-2}$ | < 0.001   |
| Sutterellaceae         | $1.39 \times 10^{-2}$ | < 0.001   |
| Frankiaceae            | $1.36 \times 10^{-2}$ | < 0.001   |
| Solibacteraceae        | $1.32 \times 10^{-2}$ | < 0.001   |
| Unknown Family         | $1.29 \times 10^{-2}$ | < 0.001   |
| Acetobacteraceae       | $1.27 \times 10^{-2}$ | < 0.001   |
| Nakamurellaceae        | $1.27 \times 10^{-2}$ | < 0.001   |
| Devosiaceae            | $1.23 \times 10^{-2}$ | < 0.001   |
| Thermoanaerobaculaceae | $1.15 \times 10^{-2}$ | < 0.001   |
| URHD0088               | $1.13 \times 10^{-2}$ | < 0.001   |
| Beijerinckiaceae       | $1.12 \times 10^{-2}$ | < 0.001   |
| Microtrichaceae        | $1.12 \times 10^{-2}$ | < 0.001   |
| Solirubrobacteraceae   | $1.11 \times 10^{-2}$ | < 0.001   |
| Cellulomonadaceae      | $1.08 \times 10^{-2}$ | < 0.001   |
| Isosphaeraceae         | $1.05 \times 10^{-2}$ | < 0.001   |
| Pirellulaceae          | $1.05 \times 10^{-2}$ | < 0.001   |
| Xiphinematobacteraceae | $1.03 \times 10^{-2}$ | < 0.001   |
| Acidothermaceae        | $1.03 \times 10^{-2}$ | < 0.001   |
| Nitrosomonadaceae      | $1.02 \times 10^{-2}$ | < 0.001   |
| Pedosphaeraceae        | $1.02 \times 10^{-2}$ | < 0.001   |

|                                |                       |         |
|--------------------------------|-----------------------|---------|
| Desulfitobacteriaceae          | $9.98 \times 10^{-3}$ | < 0.001 |
| A21b                           | $9.65 \times 10^{-3}$ | < 0.001 |
| Bryobacteraceae                | $9.62 \times 10^{-3}$ | < 0.001 |
| Rhodomicrobiaceae              | $9.47 \times 10^{-3}$ | < 0.001 |
| Streptomycetaceae              | $9.37 \times 10^{-3}$ | < 0.001 |
| Acidobacteriaceae (Subgroup 1) | $9.35 \times 10^{-3}$ | < 0.001 |
| Rhodanobacteraceae             | $9.28 \times 10^{-3}$ | < 0.001 |
| Sphingomonadaceae              | $9.24 \times 10^{-3}$ | < 0.001 |
| Pleomorphomonadaceae           | $9.22 \times 10^{-3}$ | < 0.001 |
| A0839                          | $9.19 \times 10^{-3}$ | < 0.001 |
| CPla-3 termite group           | $9.13 \times 10^{-3}$ | < 0.001 |
| Ilumatobacteraceae             | $9.13 \times 10^{-3}$ | < 0.001 |
| Gemmatimonadaceae              | $9.07 \times 10^{-3}$ | < 0.001 |
| Reyranellaceae                 | $8.88 \times 10^{-3}$ | < 0.001 |
| Gemmataceae                    | $8.82 \times 10^{-3}$ | < 0.001 |
| Mycobacteriaceae               | $8.80 \times 10^{-3}$ | < 0.001 |
| Rhizobiaceae                   | $8.32 \times 10^{-3}$ | < 0.001 |
| Micromonosporaceae             | $8.16 \times 10^{-3}$ | < 0.001 |
| Paenibacillaceae               | $8.03 \times 10^{-3}$ | < 0.001 |
| Burkholderiaceae               | $8.03 \times 10^{-3}$ | < 0.001 |
| Vermiphilaceae                 | $7.94 \times 10^{-3}$ | < 0.001 |
| SC-I-84                        | $7.90 \times 10^{-3}$ | < 0.001 |
| Legionellaceae                 | $7.86 \times 10^{-3}$ | < 0.001 |
| Steroidobacteraceae            | $7.78 \times 10^{-3}$ | < 0.001 |
| WD2101 soil group              | $7.66 \times 10^{-3}$ | < 0.001 |
| Labraceae                      | $7.65 \times 10^{-3}$ | < 0.001 |
| Microscillaceae                | $7.62 \times 10^{-3}$ | < 0.001 |
| Gimesiaceae                    | $7.45 \times 10^{-3}$ | < 0.001 |
| Sphingobacteriaceae            | $7.42 \times 10^{-3}$ | < 0.001 |
| Myxococcaceae                  | $7.42 \times 10^{-3}$ | < 0.001 |
| Pseudonocardiaceae             | $7.41 \times 10^{-3}$ | < 0.001 |
| Comamonadaceae                 | $7.37 \times 10^{-3}$ | < 0.001 |
| LWQ8                           | $7.32 \times 10^{-3}$ | < 0.001 |
| Rhizobiales Incertae Sedis     | $7.27 \times 10^{-3}$ | < 0.001 |
| Anaerolineaceae                | $7.03 \times 10^{-3}$ | < 0.001 |
| Polyangiaceae                  | $7.02 \times 10^{-3}$ | < 0.001 |
| Oxalobacteraceae               | $6.71 \times 10^{-3}$ | < 0.001 |
| Magnetospirillaceae            | $6.71 \times 10^{-3}$ | < 0.001 |
| Spirochaetaceae                | $6.69 \times 10^{-3}$ | < 0.001 |
| Hyphomonadaceae                | $6.64 \times 10^{-3}$ | < 0.001 |

|                       |                       |         |
|-----------------------|-----------------------|---------|
| Sporichthyaceae       | $6.40 \times 10^{-3}$ | < 0.001 |
| Blastocatellaceae     | $6.03 \times 10^{-3}$ | < 0.001 |
| Methylacidiphilaceae  | $6.02 \times 10^{-3}$ | < 0.001 |
| env.OPS 17            | $6.01 \times 10^{-3}$ | < 0.001 |
| WWH38                 | $5.91 \times 10^{-3}$ | < 0.001 |
| Saccharimonadaceae    | $5.71 \times 10^{-3}$ | < 0.001 |
| Anaeromyxobacteraceae | $5.55 \times 10^{-3}$ | < 0.001 |
| Chthoniobacteraceae   | $5.52 \times 10^{-3}$ | < 0.001 |
| Bacillaceae           | $5.42 \times 10^{-3}$ | < 0.001 |
| Lachnospiraceae       | $5.34 \times 10^{-3}$ | < 0.001 |
| Micropepsaceae        | $5.21 \times 10^{-3}$ | < 0.001 |
| Opitutaceae           | $5.08 \times 10^{-3}$ | < 0.001 |
| Clostridiaceae        | $5.07 \times 10^{-3}$ | < 0.001 |
| Actinospicaceae       | $5.07 \times 10^{-3}$ | < 0.001 |
| Caulobacteraceae      | $4.96 \times 10^{-3}$ | < 0.001 |
| KF-JG30-B3            | $4.81 \times 10^{-3}$ | < 0.001 |
| Phycisphaeraceae      | $4.79 \times 10^{-3}$ | < 0.001 |
| JG30-KF-CM45          | $4.78 \times 10^{-3}$ | < 0.001 |
| Chthonomonadaceae     | $4.76 \times 10^{-3}$ | < 0.001 |
| Koribacteraceae       | $4.70 \times 10^{-3}$ | < 0.001 |
| Haliangiaceae         | $4.54 \times 10^{-3}$ | < 0.001 |
| Sandaracinaceae       | $4.44 \times 10^{-3}$ | < 0.001 |
| Parvibaculaceae       | $4.35 \times 10^{-3}$ | < 0.001 |
| Pyrinomonadaceae      | $4.34 \times 10^{-3}$ | < 0.001 |
| Xanthomonadaceae      | $4.27 \times 10^{-3}$ | < 0.001 |
| Bdellovibrionaceae    | $4.22 \times 10^{-3}$ | < 0.001 |
| Simkaniaceae          | $4.15 \times 10^{-3}$ | < 0.001 |
| Parachlamydiaceae     | $4.13 \times 10^{-3}$ | < 0.001 |
| BIrii41               | $4.04 \times 10^{-3}$ | < 0.001 |
| A4b                   | $3.99 \times 10^{-3}$ | < 0.001 |
| Pseudomonadaceae      | $3.76 \times 10^{-3}$ | < 0.001 |
| Phaselicytidaceae     | $3.74 \times 10^{-3}$ | < 0.001 |
| Chitinophagaceae      | $3.72 \times 10^{-3}$ | < 0.001 |
| SM2D12                | $3.67 \times 10^{-3}$ | < 0.001 |
| Thermomonosporaceae   | $3.65 \times 10^{-3}$ | < 0.001 |
| Rhodospirillaceae     | $3.63 \times 10^{-3}$ | < 0.001 |
| Amoebophilaceae       | $3.60 \times 10^{-3}$ | < 0.001 |
| CWT CU03-E12          | $3.60 \times 10^{-3}$ | < 0.001 |
| Nitrospiraceae        | $3.57 \times 10^{-3}$ | < 0.001 |
| Alicyclobacillaceae   | $3.54 \times 10^{-3}$ | < 0.001 |

|                        |                       |         |
|------------------------|-----------------------|---------|
| Inquilinaceae          | $3.53 \times 10^{-3}$ | < 0.001 |
| cvE6                   | $3.53 \times 10^{-3}$ | < 0.001 |
| Coxiellaceae           | $3.50 \times 10^{-3}$ | < 0.001 |
| Verrucomicrobiaceae    | $3.45 \times 10^{-3}$ | < 0.001 |
| Elsteraceae            | $3.38 \times 10^{-3}$ | < 0.001 |
| UBA12409               | $3.37 \times 10^{-3}$ | < 0.001 |
| Chlamydiaceae          | $3.29 \times 10^{-3}$ | < 0.001 |
| Flavobacteriaceae      | $3.26 \times 10^{-3}$ | < 0.001 |
| Obscuribacteraceae     | $3.21 \times 10^{-3}$ | < 0.001 |
| Gaiellaceae            | $3.19 \times 10^{-3}$ | < 0.001 |
| Vicinamibacteraceae    | $3.10 \times 10^{-3}$ | < 0.001 |
| Propionibacteriaceae   | $3.03 \times 10^{-3}$ | < 0.001 |
| WX65                   | $3.02 \times 10^{-3}$ | < 0.001 |
| Thermoactinomycetaceae | $3.02 \times 10^{-3}$ | < 0.001 |
| Babeliaceae            | $2.99 \times 10^{-3}$ | < 0.001 |
| Fimbriimonadaceae      | $2.87 \times 10^{-3}$ | < 0.001 |
| Diplorickettsiaceae    | $2.82 \times 10^{-3}$ | < 0.001 |
| TRA3-20                | $2.75 \times 10^{-3}$ | < 0.001 |
| AKYH767                | $2.74 \times 10^{-3}$ | < 0.001 |
| Holosporaceae          | $2.71 \times 10^{-3}$ | < 0.001 |
| Schlesneriaceae        | $2.62 \times 10^{-3}$ | < 0.001 |
| 37-13                  | $2.59 \times 10^{-3}$ | < 0.001 |
| Methyloiligellaceae    | $2.56 \times 10^{-3}$ | < 0.001 |
| Peptostreptococcaceae  | $2.49 \times 10^{-3}$ | < 0.001 |
| Moraxellaceae          | $2.42 \times 10^{-3}$ | < 0.001 |
| Terrimicrobiaceae      | $2.28 \times 10^{-3}$ | < 0.001 |
| Iamiaceae              | $2.27 \times 10^{-3}$ | < 0.001 |
| Leptospiraceae         | $2.27 \times 10^{-3}$ | 0.002   |
| Azospirillaceae        | $2.24 \times 10^{-3}$ | 0.002   |
| Paracaedibacteraceae   | $2.14 \times 10^{-3}$ | < 0.001 |
| Rickettsiaceae         | $2.12 \times 10^{-3}$ | < 0.001 |
| Planococcaceae         | $2.12 \times 10^{-3}$ | 0.001   |
| Candidatus Jidaibacter | $2.10 \times 10^{-3}$ | 0.001   |
| Streptosporangiaceae   | $1.95 \times 10^{-3}$ | 0.002   |
| Armatimonadaceae       | $1.91 \times 10^{-3}$ | < 0.001 |
| Rhodobacteraceae       | $1.88 \times 10^{-3}$ | 0.008   |
| Yersiniaceae           | $1.87 \times 10^{-3}$ | 0.008   |
| Erysipelotrichaceae    | $1.86 \times 10^{-3}$ | 0.001   |
| KD3-93                 | $1.81 \times 10^{-3}$ | 0.005   |
| Acholeplasmataceae     | $1.68 \times 10^{-3}$ | 0.002   |

|                      |                       |       |
|----------------------|-----------------------|-------|
| Rhodocyclaceae       | $1.66 \times 10^{-3}$ | 0.003 |
| Oligoflexaceae       | $1.62 \times 10^{-3}$ | 0.002 |
| YM_S32_TM7_50_20     | $1.60 \times 10^{-3}$ | 0.002 |
| Cytophagaceae        | $1.60 \times 10^{-3}$ | 0.003 |
| Vampirovibrionaceae  | $1.48 \times 10^{-3}$ | 0.006 |
| Nocardiaceae         | $1.47 \times 10^{-3}$ | 0.011 |
| Chitinimonadaceae    | $1.41 \times 10^{-3}$ | 0.011 |
| type III             | $1.40 \times 10^{-3}$ | 0.006 |
| Intrasporangiaceae   | $1.39 \times 10^{-3}$ | 0.029 |
| NS11-12 marine group | $1.30 \times 10^{-3}$ | 0.034 |
| Ruminococcaceae      | $1.28 \times 10^{-3}$ | 0.007 |
| Solimonadaceae       | $1.21 \times 10^{-3}$ | 0.016 |
| Neisseriaceae        | $1.15 \times 10^{-3}$ | 0.021 |
| Micavibrionaceae     | $1.06 \times 10^{-3}$ | 0.029 |
| Puniceicoccaceae     | $1.02 \times 10^{-3}$ | 0.032 |

---

**Supplementary Table S3 | Genera that exhibited the greatest potential impacts on the fungal assembly landscape along their abundance gradients.** The  $\Delta topography$  and  $\Delta evenness$  indices respectively represented changes in the overall topography and evenness of energy landscape architecture along the abundance gradients of a focal genus (from absence to their median abundance condition; Fig. 1d-g). The z-standardized metrics of  $\Delta topography$  and  $\Delta evenness$  are obtained based on the randomization analysis in which the abundance of a focal genus was shuffled within the root samples of the same host plant (10,000 iterations). For each host plant background, the two fungal/prokaryotic genera with the highest and significant  $\Delta topography$  are listed.

| Genus                    | Host plant     | z-standardized<br>$\Delta topography$ | $P$ (FDR)<br>[ $\Delta topography$ ] | z-standardized<br>$\Delta evenness$ | $P$ (FDR)<br>[ $\Delta evenness$ ] |
|--------------------------|----------------|---------------------------------------|--------------------------------------|-------------------------------------|------------------------------------|
| <i>Hyaloscypha</i>       | <i>Betula</i>  | 4.33                                  | < <b>0.001</b>                       | -1.63                               | 0.170                              |
| <i>Spirochaeta 2</i>     | <i>Betula</i>  | 3.47                                  | < <b>0.001</b>                       | 0.05                                | 0.517                              |
| <i>Podila</i>            | <i>Pinus</i>   | 1.03 ×10                              | < <b>0.001</b>                       | -0.19                               | 0.482                              |
| <i>Rhizobium</i>         | <i>Pinus</i>   | 6.57                                  | < <b>0.001</b>                       | -2.01                               | 0.063                              |
| <i>Oidiodendron</i>      | <i>Acer</i>    | 1.93 ×10                              | < <b>0.001</b>                       | -4.84                               | 0.030                              |
| <i>Podila</i>            | <i>Acer</i>    | 9.42                                  | < <b>0.001</b>                       | 1.13                                | 0.252                              |
| <i>Cladophialophora</i>  | <i>Populus</i> | 2.50 ×10                              | < <b>0.001</b>                       | 8.63                                | <b>0.002</b>                       |
| <i>Pezicula</i>          | <i>Populus</i> | 1.36 ×10                              | < <b>0.001</b>                       | 2.56                                | 0.129                              |
| <i>Oidiodendron</i>      | <i>Larix</i>   | 1.18 ×10                              | <b>0.001</b>                         | 2.38 ×10                            | <b>0.005</b>                       |
| <i>Archaeorhizomyces</i> | <i>Larix</i>   | 7.94                                  | < <b>0.001</b>                       | 0.06                                | 0.703                              |
| <i>Hyaloscypha</i>       | <i>Juglans</i> | 8.43                                  | < <b>0.001</b>                       | 3.45                                | <b>0.002</b>                       |
| <i>Meliniomyces</i>      | <i>Juglans</i> | 8.16                                  | < <b>0.001</b>                       | 0.97                                | 0.290                              |

**Supplementary Table S4 | Ectomycorrhizal fungal genera for which significant impacts on the fungal assembly landscape were inferred.** The  $\Delta topography$  and  $\Delta evenness$  indices respectively represented changes in the overall topography and evenness of energy landscape architecture along the abundance gradients of a focal genus (from absence to their median abundance condition; Fig. 1d-g). The z-standardized metrics of  $\Delta topography$  and  $\Delta evenness$  are obtained based on the randomization analysis in which the abundance of a focal genus was shuffled within the root samples of the same host plant (10,000 iterations). The ectomycorrhizal genera exhibited significant  $\Delta topography$  are listed.

| Genus             | Host plant     | z-standardized<br>$\Delta topography$ | $P$ (FDR)<br>[ $\Delta topography$ ] | z-standardized<br>$\Delta evenness$ | $P$ (FDR)<br>[ $\Delta evenness$ ] |
|-------------------|----------------|---------------------------------------|--------------------------------------|-------------------------------------|------------------------------------|
| <i>Amanita</i>    | <i>Populus</i> | 8.83                                  | <b>&lt; 0.001</b>                    | 3.23                                | 0.081                              |
| <i>Russula</i>    | <i>Acer</i>    | 4.38                                  | <b>&lt; 0.001</b>                    | 2.55                                | <b>0.020</b>                       |
| <i>Russula</i>    | <i>Juglans</i> | 4.10                                  | <b>&lt; 0.001</b>                    | -1.89                               | 0.086                              |
| <i>Tomentella</i> | <i>Populus</i> | 2.87                                  | <b>&lt; 0.001</b>                    | 2.27                                | 0.081                              |
| <i>Russula</i>    | <i>Pinus</i>   | 4.24                                  | <b>0.001</b>                         | 1.21                                | 0.155                              |
| <i>Thelephora</i> | <i>Populus</i> | 6.73                                  | <b>0.001</b>                         | 1.47                                | 0.192                              |
| <i>Tomentella</i> | <i>Juglans</i> | 3.19                                  | <b>0.001</b>                         | -1.72                               | 0.123                              |
| <i>Sebacina</i>   | <i>Acer</i>    | 3.64                                  | <b>0.002</b>                         | 0.99                                | 0.311                              |
| <i>Amanita</i>    | <i>Larix</i>   | 4.85                                  | <b>0.006</b>                         | 0.89                                | 0.311                              |
| <i>Amanita</i>    | <i>Acer</i>    | 2.85                                  | <b>0.007</b>                         | -0.45                               | 0.372                              |
| <i>Amanita</i>    | <i>Pinus</i>   | 3.14                                  | <b>0.009</b>                         | -2.43                               | 0.098                              |
| <i>Sebacina</i>   | <i>Larix</i>   | 2.84                                  | <b>0.012</b>                         | 2.79                                | <b>0.025</b>                       |
| <i>Tricholoma</i> | <i>Betula</i>  | 1.60                                  | <b>0.027</b>                         | -1.49                               | 0.365                              |
| <i>Thelephora</i> | <i>Larix</i>   | 4.17                                  | <b>0.029</b>                         | -0.28                               | 0.710                              |
| <i>Lactarius</i>  | <i>Acer</i>    | 2.09                                  | <b>0.030</b>                         | 1.77                                | 0.151                              |
| <i>Sebacina</i>   | <i>Pinus</i>   | 2.39                                  | <b>0.035</b>                         | -2.14                               | 0.148                              |
| <i>Thelephora</i> | <i>Pinus</i>   | 2.19                                  | <b>0.042</b>                         | -2.26                               | 0.157                              |
| <i>Lactarius</i>  | <i>Larix</i>   | 3.52                                  | <b>0.048</b>                         | -0.59                               | 0.687                              |

**Supplementary Table S5 | Genera that exhibited the greatest potential impacts on the prokaryotic assembly landscape along their abundance gradients.** The  $\Delta topography$  and  $\Delta evenness$  indices respectively represented changes in the overall topography and evenness of energy landscape architecture along the abundance gradients of a focal genus (from absence to their median abundance condition; Fig. 1d-g). The z-standardized metrics of  $\Delta topography$  and  $\Delta evenness$  are obtained based on the randomization analysis in which the abundance of a focal genus was shuffled within the root samples of the same host plant (10,000 iterations). For each host plant background, the two fungal/prokaryotic genera with the highest and significant  $\Delta topography$  are listed.

| Genus                         | Host plant     | z-standardized<br>$\Delta topography$ | $P$ (FDR)<br>[ $\Delta topography$ ] | z-standardized<br>$\Delta evenness$ | $P$ (FDR)<br>[ $\Delta evenness$ ] |
|-------------------------------|----------------|---------------------------------------|--------------------------------------|-------------------------------------|------------------------------------|
| <i>Candidatus Udaeobacter</i> | <i>Betula</i>  | 2.70×10                               | < 0.001                              | -2.76                               | 0.020                              |
| <i>Candidatus Solibacter</i>  | <i>Betula</i>  | 2.67×10                               | < 0.001                              | 3.94                                | 0.005                              |
| <i>Candidatus Udaeobacter</i> | <i>Pinus</i>   | 2.63×10                               | < 0.001                              | 4.49×10 <sup>-5</sup>               | 0.532                              |
| <i>Candidatus Solibacter</i>  | <i>Pinus</i>   | 2.17×10                               | < 0.001                              | 1.77                                | 0.124                              |
| <i>Candidatus Solibacter</i>  | <i>Acer</i>    | 2.34×10                               | < 0.001                              | 2.57                                | 0.039                              |
| <i>Candidatus Udaeobacter</i> | <i>Acer</i>    | 2.31×10                               | < 0.001                              | -0.42                               | 0.434                              |
| <i>Candidatus Udaeobacter</i> | <i>Populus</i> | 3.02×10                               | < 0.001                              | -3.02                               | 0.012                              |
| <i>Candidatus Solibacter</i>  | <i>Populus</i> | 2.75×10                               | < 0.001                              | -2.73                               | 0.029                              |
| <i>Candidatus Udaeobacter</i> | <i>Larix</i>   | 2.64×10                               | < 0.001                              | -2.00                               | 0.090                              |
| <i>Candidatus Solibacter</i>  | <i>Larix</i>   | 2.26×10                               | < 0.001                              | -0.51                               | 0.407                              |
| <i>Candidatus Udaeobacter</i> | <i>Juglans</i> | 3.26×10                               | < 0.001                              | -8.18                               | 0.002                              |
| <i>Candidatus Solibacter</i>  | <i>Juglans</i> | 2.93×10                               | < 0.001                              | -8.42                               | 0.002                              |

448 **Supplementary Table S6 | Genera that exhibited the greatest potential impacts on the fungal**  
449 **assembly landscape at the 25% quantiles of their abundance.** The z-standardized  $\Delta topography$  and  
450  $\Delta evenness$  indices respectively calculated along the abundance gradients of a focal genus (from  
451 absence to their 25% quantiles of their abundances within the detected samples; Fig. 1d-g). For each  
452 host plant background, the two fungal/prokaryotic genera with the highest and significant  
453  $\Delta topography$  are listed.

| Genus                    | Host plant     | z-standardized<br>$\Delta topography$ | $P$ (FDR)<br>[ $\Delta topography$ ] | z-standardized<br>$\Delta evenness$ | $P$ (FDR)<br>[ $\Delta evenness$ ] |
|--------------------------|----------------|---------------------------------------|--------------------------------------|-------------------------------------|------------------------------------|
| <i>Archaeorhizomyces</i> | <i>Acer</i>    | 8.12                                  | < <b>0.001</b>                       | -1.44                               | 0.091                              |
| <i>Haliangium</i>        | <i>Acer</i>    | 7.16                                  | < <b>0.001</b>                       | -3.35                               | 0.026                              |
| <i>Hyaloscypha</i>       | <i>Betula</i>  | 4.30                                  | < <b>0.001</b>                       | -2.09                               | 0.107                              |
| <i>Podila</i>            | <i>Betula</i>  | 3.10                                  | < <b>0.001</b>                       | -0.74                               | 0.287                              |
| <i>Hyaloscypha</i>       | <i>Juglans</i> | 9.58                                  | < <b>0.001</b>                       | 3.86                                | <b>0.002</b>                       |
| <i>Haliangium</i>        | <i>Juglans</i> | 6.85                                  | < <b>0.001</b>                       | -2.48                               | 0.035                              |
| <i>Oidiodendron</i>      | <i>Larix</i>   | 6.20                                  | < <b>0.001</b>                       | 6.11×10                             | <b>0.002</b>                       |
| <i>Podila</i>            | <i>Larix</i>   | 1.08                                  | <b>0.001</b>                         | 6.58                                | <b>0.002</b>                       |
| <i>Podila</i>            | <i>Pinus</i>   | 1.05                                  | < <b>0.001</b>                       | 0.48                                | 0.301                              |
| <i>Cladophialophora</i>  | <i>Pinus</i>   | 8.92                                  | < <b>0.001</b>                       | 0.27                                | 0.112                              |
| <i>Cladophialophora</i>  | <i>Populus</i> | 1.95×10                               | < <b>0.001</b>                       | 2.34                                | 0.105                              |
| <i>Pezicula</i>          | <i>Populus</i> | 1.46                                  | < <b>0.001</b>                       | 2.82                                | 0.112                              |

454

**Supplementary Table S7 | Genera that exhibited the greatest potential impacts on the prokaryotic assembly landscape at the 25% quantiles of their abundance.** The z-standardized  $\Delta$ topography and  $\Delta$ evenness indices respectively calculated along the abundance gradients of a focal genus (from absence to their 25% quantiles of their abundances within the detected samples; Fig. 1d-g). For each host plant background, the two fungal/prokaryotic genera with the highest and significant  $\Delta$ topography are listed.

| Genus                         | Host plant     | z-standardized<br>$\Delta$ topography | <i>P</i> (FDR)<br>[ $\Delta$ topography] | z-standardized<br>$\Delta$ evenness | <i>P</i> (FDR)<br>[ $\Delta$ evenness] |
|-------------------------------|----------------|---------------------------------------|------------------------------------------|-------------------------------------|----------------------------------------|
| <i>Candidatus Solibacter</i>  | <i>Acer</i>    | 2.31×10                               | < <b>0.001</b>                           | 1.88                                | 0.120                                  |
| <i>Mycobacterium</i>          | <i>Acer</i>    | 2.22×10                               | < <b>0.001</b>                           | -1.24                               | 0.225                                  |
| <i>Pir4 lineage</i>           | <i>Betula</i>  | 2.56×10                               | < <b>0.001</b>                           | -2.93                               | 0.034                                  |
| <i>Candidatus Solibacter</i>  | <i>Betula</i>  | 2.53×10                               | < <b>0.001</b>                           | 8.14                                | <b>0.002</b>                           |
| <i>Candidatus Udaeobacter</i> | <i>Juglans</i> | 3.27×10                               | < <b>0.001</b>                           | -5.50                               | <b>0.002</b>                           |
| <i>Candidatus Solibacter</i>  | <i>Juglans</i> | 2.82×10                               | < <b>0.001</b>                           | -5.24                               | <b>0.002</b>                           |
| <i>Candidatus Udaeobacter</i> | <i>Larix</i>   | 2.35×10                               | < <b>0.001</b>                           | -1.90                               | 0.106                                  |
| <i>Labrys</i>                 | <i>Larix</i>   | 2.29×10                               | < <b>0.001</b>                           | -0.36                               | 0.447                                  |
| <i>Pir4 lineage</i>           | <i>Pinus</i>   | 2.18×10                               | < <b>0.001</b>                           | -3.59                               | <b>0.007</b>                           |
| <i>Candidatus Udaeobacter</i> | <i>Pinus</i>   | 2.15×10                               | < <b>0.001</b>                           | 2.58                                | 0.043                                  |
| <i>Candidatus Udaeobacter</i> | <i>Populus</i> | 2.96×10                               | < <b>0.001</b>                           | -0.97                               | 0.285                                  |
| <i>Candidatus Solibacter</i>  | <i>Populus</i> | 2.80×10                               | < <b>0.001</b>                           | -2.01                               | 0.092                                  |

**Supplementary Table S8 | Genera that exhibited the greatest potential impacts on the fungal assembly landscape at the 75% quantiles of their abundance.** The z-standardized  $\Delta topography$  and  $\Delta evenness$  indices respectively calculated along the abundance gradients of a focal genus (from absence to their 75% quantiles of their abundances within the detected samples; Fig. 1d-g). For each host plant background, the two fungal/prokaryotic genera with the highest and significant  $\Delta topography$  are listed.

| Genus                   | Host plant     | z-standardized<br>$\Delta topography$ | $P$ (FDR)<br>[ $\Delta topography$ ] | z-standardized<br>$\Delta evenness$ | $P$ (FDR)<br>[ $\Delta evenness$ ] |
|-------------------------|----------------|---------------------------------------|--------------------------------------|-------------------------------------|------------------------------------|
| <i>Hyaloscypha</i>      | <i>Betula</i>  | 4.75                                  | < <b>0.001</b>                       | -1.19                               | 0.387                              |
| <i>Actinospica</i>      | <i>Betula</i>  | 3.55                                  | < <b>0.001</b>                       | 0.19                                | 0.419                              |
| <i>Podila</i>           | <i>Pinus</i>   | 1.05×10                               | < <b>0.001</b>                       | -2.04                               | 0.045                              |
| <i>Phialocephala</i>    | <i>Pinus</i>   | 7.32                                  | < <b>0.001</b>                       | -3.69                               | 0.039                              |
| <i>Oidiodendron</i>     | <i>Acer</i>    | 1.23×10                               | < <b>0.001</b>                       | 3.80                                | <b>0.016</b>                       |
| <i>Podila</i>           | <i>Acer</i>    | 9.28                                  | < <b>0.001</b>                       | -0.94                               | 0.246                              |
| <i>Cladophialophora</i> | <i>Populus</i> | 2.48×10                               | < <b>0.001</b>                       | 9.56                                | <b>0.002</b>                       |
| <i>Oidiodendron</i>     | <i>Populus</i> | 1.65×10                               | < <b>0.001</b>                       | -4.03                               | <b>0.020</b>                       |
| <i>Cladophialophora</i> | <i>Larix</i>   | 5.30×10                               | < <b>0.001</b>                       | 0.10                                | 0.944                              |
| <i>Phialocephala</i>    | <i>Larix</i>   | 1.52×10                               | < <b>0.001</b>                       | 3.30                                | 0.049                              |
| <i>Hyaloscypha</i>      | <i>Juglans</i> | 1.02×10                               | < <b>0.001</b>                       | 5.25                                | <b>0.002</b>                       |
| <i>Meliniomyces</i>     | <i>Juglans</i> | 9.31                                  | < <b>0.001</b>                       | 0.20                                | 0.487                              |

**Supplementary Table S9 | Genera that exhibited the greatest potential impacts on the prokaryotic assembly landscape at the 75% quantiles of their abundance.** The z-standardized  $\Delta$ topography and  $\Delta$ evenness indices respectively calculated along the abundance gradients of a focal genus (from absence to their 75% quantiles of their abundances within the detected samples; Fig. 1d-g). For each host plant background, the two fungal/prokaryotic genera with the highest and significant  $\Delta$ topography are listed.

| Genus                         | Host plant     | z-standardized<br>$\Delta$ topography | P (FDR)<br>[ $\Delta$ topography] | z-standardized<br>$\Delta$ evenness | P (FDR)<br>[ $\Delta$ evenness] |
|-------------------------------|----------------|---------------------------------------|-----------------------------------|-------------------------------------|---------------------------------|
| <i>Candidatus Solibacter</i>  | <i>Betula</i>  | 2.66×10                               | < 0.001                           | 1.97                                | 0.115                           |
| <i>Candidatus Udaeobacter</i> | <i>Betula</i>  | 2.48×10                               | < 0.001                           | -3.66                               | 0.004                           |
| <i>Candidatus Udaeobacter</i> | <i>Pinus</i>   | 2.57×10                               | < 0.001                           | -0.62                               | 0.375                           |
| <i>Candidatus Solibacter</i>  | <i>Pinus</i>   | 2.31×10                               | < 0.001                           | 1.39                                | 0.196                           |
| <i>Candidatus Solibacter</i>  | <i>Acer</i>    | 2.50×10                               | < 0.001                           | 1.02                                | 0.285                           |
| <i>Candidatus Udaeobacter</i> | <i>Acer</i>    | 2.38×10                               | < 0.001                           | -1.63                               | 0.151                           |
| <i>Candidatus Solibacter</i>  | <i>Populus</i> | 2.82×10                               | < 0.001                           | -4.23                               | 0.002                           |
| <i>Candidatus Udaeobacter</i> | <i>Populus</i> | 2.73×10                               | < 0.001                           | -4.90                               | 0.002                           |
| <i>Candidatus Udaeobacter</i> | <i>Larix</i>   | 2.61×10                               | < 0.001                           | -4.86                               | 0.002                           |
| <i>Candidatus Solibacter</i>  | <i>Larix</i>   | 2.35×10                               | < 0.001                           | -3.93                               | 0.002                           |
| <i>Candidatus Udaeobacter</i> | <i>Juglans</i> | 3.07×10                               | < 0.001                           | -7.48                               | 0.002                           |
| <i>Candidatus Solibacter</i>  | <i>Juglans</i> | 2.85×10                               | < 0.001                           | -7.74                               | 0.002                           |
